# Supplementary material
Source: PubMed Central journal article supplement (PMC5860880)
Supplement: NIHMS944447-supplement-2.pdf [file NIHMS944447-supplement-2.pdf]

# The Sixth Transmembrane Segment Is a Major Gating Component of the TMEM16A Calcium-Activated Chloride Channel

## Highlights

- TMEM16A is an ion channel gated by voltage, external anions, and internal calcium
- Alanine scanning mutagenesis permits these gating modes to be analyzed individually
- The sixth transmembrane helix has a critical role in linking TMEM16A gating modes

## Authors

Christian J. Peters, John M. Gilchrist, Jason Tien, ..., Yuh Nung Jan, Michael Grabe, Lily Y. Jan

## Correspondence

christian.peters@ucsf.edu (C.J.P.),  
lily.jan@ucsf.edu (L.Y.J.)

## In Brief

TMEM16A is an ion channel protein with functions in a multitude of cell types. Peters et al. identified a specific domain that integrates the responses of this channel to three separable physiological stimuli.

# The Sixth Transmembrane Segment Is a Major Gating Component of the TMEM16A Calcium-Activated Chloride Channel

Christian J. Peters,<sup>1,\*</sup> John M. Gilchrist,<sup>1</sup> Jason Tien,<sup>1</sup> Neville P. Bethel,<sup>2</sup> Lijun Qi,<sup>1</sup> Tingxu Chen,<sup>1</sup> Lynn Wang,<sup>1</sup> Yuh Nung Jan,<sup>1,3</sup> Michael Grabe,<sup>2</sup> and Lily Y. Jan<sup>1,3,4,\*</sup>

<sup>1</sup>Departments of Physiology, Biophysics and Biochemistry

<sup>2</sup>Department of Pharmaceutical Chemistry and Cardiovascular Research Institute

<sup>3</sup>Howard Hughes Medical Institute

University of California, San Francisco, San Francisco, CA 94158, USA

<sup>4</sup>Lead Contact

\*Correspondence: [christian.peters@ucsf.edu](mailto:christian.peters@ucsf.edu) (C.J.P.), [lily.jan@ucsf.edu](mailto:lily.jan@ucsf.edu) (L.Y.J.)

<https://doi.org/10.1016/j.neuron.2018.01.048>

## SUMMARY

Calcium-activated chloride channels (CaCCs) formed by TMEM16A or TMEM16B are broadly expressed in the nervous system, smooth muscles, exocrine glands, and other tissues. With two calcium-binding sites and a pore within each monomer, the dimeric CaCC exhibits voltage-dependent calcium sensitivity. Channel activity also depends on the identity of permeant anions. To understand how CaCC regulates neuronal signaling and how CaCC is, in turn, modulated by neuronal activity, we examined the molecular basis of CaCC gating. Here, we report that voltage modulation of TMEM16A-CaCC involves voltage-dependent occupancy of calcium- and anion-binding site(s) within the membrane electric field as well as a voltage-dependent conformational change intrinsic to the channel protein. These gating modalities all critically depend on the sixth transmembrane segment.

## INTRODUCTION

While cation channel gating and its contribution to the physiology of excitable cells have been studied extensively, gating mechanisms of anion channels are far less well understood. TMEM16A (transmembrane protein of unknown function 16A, also known as Anoctamin-1 or ANO1) is a calcium-activated chloride channel (CaCC) (Caputo et al., 2008; Schroeder et al., 2008; Yang et al., 2008) found in many epithelial cell types (Huang et al., 2009), nociceptive neurons (Cho et al., 2012), smooth muscles (Davis et al., 2010; Huang et al., 2012), and tumor cells (Ardeleanu et al., 2009; Duvvuri et al., 2012). A hallmark feature of TMEM16A-CaCCs is the apparent voltage dependence of its Ca<sup>2+</sup> sensitivity. To understand how TMEM16A-CaCCs might contribute to cellular physiology, we examined how this channel is controlled by membrane potential, Ca<sup>2+</sup> ions, and permeant anions.

TMEM16A-CaCCs are homodimers of subunits each containing ten membrane-spanning segments (Paulino et al., 2017; Dang et al., 2017). Intracellular Ca<sup>2+</sup> ions are coordinated by the side chains of 6 amino acid residues (Yu et al., 2012; Tien et al., 2014; Dang et al., 2017; Paulino et al., 2017), and Ca<sup>2+</sup> binding results in the activation of a channel that prefers permeation of Cl<sup>-</sup> anions over small monovalent cations and larger I<sup>-</sup> anions over Cl<sup>-</sup> anions (Caputo et al., 2008; Schroeder et al., 2008; Yang et al., 2008). Structural information suggests that anions traverse through a passage formed by portions of transmembrane helices 3–8 (Paulino et al., 2017; Dang et al., 2017). Mutations of residues surrounding this passage can modify anion selectivity (Peters et al., 2015; Dang et al., 2017) and anion/cation preference (Yang et al., 2012). The two pores of the dimeric channel likely function independently (Jeng et al., 2016; Lim et al., 2016).

TMEM16A open probability depends on not only intracellular Ca<sup>2+</sup>, but also membrane voltage and external anions (Perez-Cornejo et al., 2004; Contreras-Vite et al., 2016). While nanomolar intracellular concentrations of Ca<sup>2+</sup> produce an outwardly rectifying current, micromolar and higher concentrations of Ca<sup>2+</sup> elicit an Ohmic current. The transition between rectifying and Ohmic currents can be achieved at lower concentrations of intracellular Ca<sup>2+</sup> if extracellular Cl<sup>-</sup> is replaced with more permeant anions such as I<sup>-</sup> (Cruz-Rangel et al., 2017). A kinetic model of gating has been proposed to account for contributions from these different stimuli (Contreras-Vite et al., 2016), but the molecular mechanisms for these gating processes are unclear. We propose that CaCC gating stems from the following voltage-dependent processes: (1) Ca<sup>2+</sup> binding occurs at a site within the membrane voltage field, causing an increase in the apparent binding affinity of the channel for Ca<sup>2+</sup> at depolarizing voltages; (2) extracellular anions potentiate anion flux by binding to one or more modulatory sites inside the electric field of a multi-ion pore; and/or (3) TMEM16A channels undergo voltage-dependent conformational changes, leading to a non-linear conductance/voltage relationship.

Here, we performed molecular dynamics (MD) simulations of the fungal homolog nhTMEM16 and incorporated TMEM16A structural information to dissect gating behavior in TMEM16A

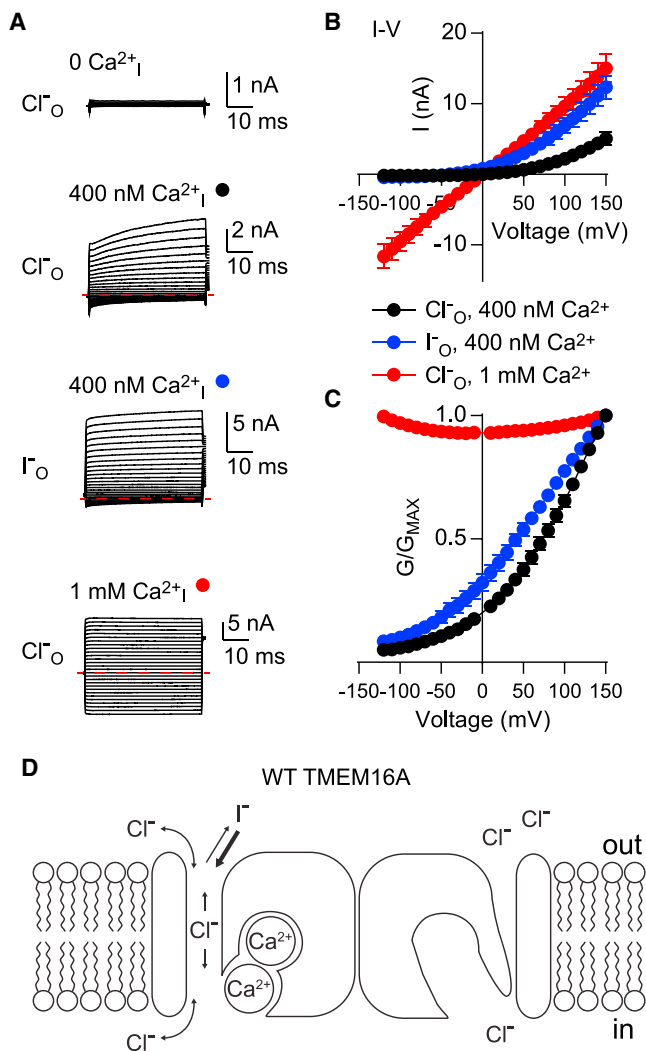

**Figure 1. TMEM16A Channel Conductance Is Modulated by Intracellular Calcium, Membrane Voltage, and Extracellular Anions**

(A) Sample traces from whole-cell patch-clamped HEK293 cells expressing WT TMEM16A and stepped from  $-120$  mV to  $+150$  mV from a holding potential of  $0$  mV in the presence of external  $140$  mM NaCl or NaI (anion indicated on the left) and internal  $140$  mM NaCl with  $0$  nM,  $400$  nM, or  $1$  mM free calcium (indicated above). Red dashed lines indicate  $0$  nA.

(B) Current-voltage (I-V) relationships for traces in (A) highlight the different factors affecting TMEM16A gating. TMEM16A is outwardly rectifying at moderate internal Ca<sup>2+</sup> but loses rectification at high internal Ca<sup>2+</sup>,  $n = 5, 5,$  and  $7$  for  $400$  nM Ca<sup>2+</sup> with Cl<sup>-</sup>,  $400$  nM Ca<sup>2+</sup> with I<sup>-</sup>, and  $1$  mM Ca<sup>2+</sup> with Cl<sup>-</sup> traces, respectively.

(C) Steady-state whole-cell conductances, derived from the data shown in (B), are corrected against the reversal potential and normalized to  $+150$  mV.

(D) A simplified schematic of TMEM16A gating illustrates a conceptual model of calcium-, voltage-, and anion-dependent modulation of channel conductance.

Error bars in (B) and (C) represent mean  $\pm$  SEM.

See also [Figures S1](#) and [S2](#).

channel mutants. We found that transmembrane segment 6 (TM6), which is  $\alpha$ -helical in both nhTMEM16 (Brunner et al., 2014) and TMEM16A (Paulino et al., 2017; Dang et al., 2017), is

flexible in MD simulations of nhTMEM16 (Figures S1A and S1B) and appears capable of adopting multiple stable conformations in TMEM16A. Furthermore, TM6 contributes residues to both the putative pore and the Ca<sup>2+</sup>-binding site (Brunner et al., 2014; Tien et al., 2014; Paulino et al., 2017; Dang et al., 2017). An alanine mutagenesis scan identified mutations that shifted the EC<sub>50</sub> for Ca<sup>2+</sup> gating at  $+60$  mV. Subsequent analysis revealed that several of these mutations decoupled the Ca<sup>2+</sup>, anion, and voltage-dependent gating processes, allowing us to study these processes in isolation. Our fast solution exchange pharmacology and patch-clamp analyses established that depolarization, intracellular Ca<sup>2+</sup>, and external anions all act upon TM6 to permit the flow of anions through the channel. Furthermore, the transfer of a mildly voltage-dependent intrinsic gating element involves at least two conformational changes of or about TM6, which influence and are influenced by the binding of intracellular Ca<sup>2+</sup> ions and the identity of the permeating anion.

## RESULTS

### Internal Calcium and External Anions Modify Voltage Dependence of TMEM16A Channel Activation

Gating of TMEM16A-CaCCs is sensitive to intracellular Ca<sup>2+</sup> level and the identity of permeant anions. To characterize these gating processes, we transiently expressed TMEM16A from *mus musculus*, fused to pEGFP at its C terminus—which we have previously found to function identically to wild-type (Tien et al., 2014; Peters et al., 2015), and is henceforth referred to as “wild-type” (WT)—in HEK293 cells, and employed whole-cell patch clamp to record currents in voltage-clamp mode. Exposing cells expressing WT TMEM16A to  $400$  nM Ca<sup>2+</sup> allowed the channel to act as an outward rectifier, with the primary flux being inward flowing Cl<sup>-</sup> ions (Figures 1A–1C). Replacement of Cl<sup>-</sup> ions with I<sup>-</sup> ions caused shifts in the reversal potential (Peters et al., 2015) as well as a sensitizing (left) shift in voltage dependence (Figures 1A–1C). Increasing intracellular Ca<sup>2+</sup> to  $1$  mM caused the channel to permit inward currents at hyperpolarizing voltages (i.e., outward flow of Cl<sup>-</sup>), leading to a nearly voltage-independent conductance-voltage relationship (Figures 1A–1C). The physical bases for how membrane voltage, intracellular Ca<sup>2+</sup> ions, and extracellular permeant anions interact to contribute to TMEM16A gating remain intriguing open questions (Figure 1D).

### Molecular Dynamics Simulation of nhTMEM16 and Cryo-EM Structures of TMEM16A-CaCC Channels Suggest that the Sixth Transmembrane Segment Contributes to Both Anion Permeation and Calcium Binding

To analyze the molecular basis of channel gating, we examined an atomic resolution structure of nhTMEM16 from *Nectria hem-atococca*, PDB: 4WIS (Brunner et al., 2014), and several recently published structures of the TMEM16A channel, PDB: 5OYB, 5OYG, 6BGI, and 6BGJ (Paulino et al., 2017; Dang et al., 2017), beginning with molecular dynamic simulations from the nhTMEM16 crystal structure (Bethel and Grabe, 2016). Briefly, nhTMEM16 was embedded in a phosphatidylcholine bilayer, and we ran a number of atomistic simulations consisting of

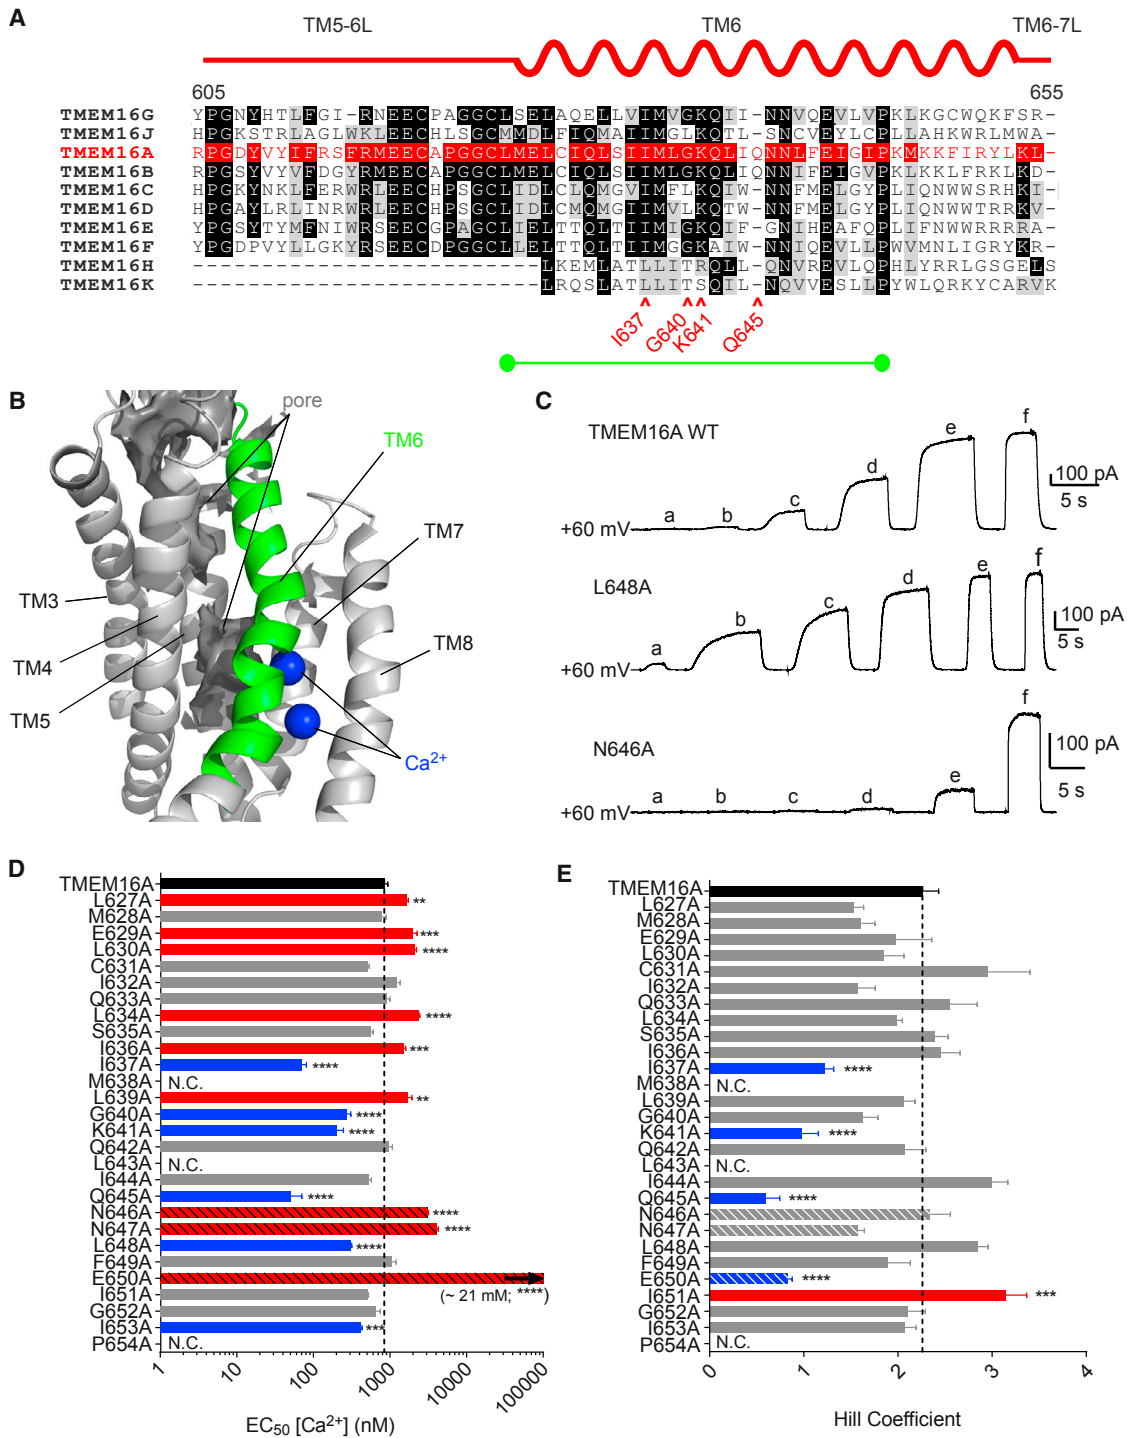

**Figure 2. Transmembrane Helix 6 Lines the Anion Pore and Harbors Ca<sup>2+</sup>-Binding Sites and Plays a Role in Ca<sup>2+</sup> Dependence of Channel Activation**

(A) A representation of mouse TMEM16A TM6 placed above an unbiased sequence alignment of the TM5-6 linker and TM6 of mouse TMEM16A with the other nine mouse TMEM16 family members. Black shading indicates that  $\geq 70\%$ , and gray shading indicates that 50%–70% of TMEM16 family members have the same amino acid as in TMEM16A, which is denoted in red. The alanine-scanned region, indicated by a green bar, includes residues of particular interest marked by red arrows.

(B) Cryo-EM structure of TMEM16A with TM6 highlighted in green, bound Ca<sup>2+</sup> ions shown in blue, and the contours of an aqueous pore shown in dark gray.

(legend continued on next page)

3.2  $\mu$ s total aggregate time. Reasoning that components of the channel involved in gating would likely be dynamic and simulation may result in new protein conformations indicative of the gating motions, we aligned snapshots of the protein taken every 16 ns and calculated the root-mean-square fluctuation (RMSF) of TM6 as well as the other two helices harboring residues involved in  $\text{Ca}^{2+}$  binding (TM7 and TM8). [Figure S1A](#) shows the TM6 helix from our 200 snapshots overlaid onto the structure of the first snapshot. TM6 has a relatively high degree of flexibility, consistent with a poorly ordered or highly mobile region. For instance, the RMSF of the cytoplasmic end of TM6 is 1.5  $\text{\AA}$  ([Figure S1B](#)). Consistent with the notion that TM6 represents a region of flexibility, two recent studies of TMEM16A structures revealed that the conformation of TM6 depends on the cryoelectron microscopy (cryo-EM) conditions ([Paulino et al., 2017](#); [Dang et al., 2017](#)). TM6 of TMEM16A reconstituted in nanodiscs ([Dang et al., 2017](#)) is largely  $\alpha$ -helical, whereas the C-terminal half of TM6 in TMEM16A solubilized with lauryl maltose neopentyl glycol is unresolved, indicative of flexibility ([Dang et al., 2017](#)).

#### Alanine Point Mutants along TM6 Produce Significant Shifts in Calcium-Dependent Activation

Alignment of TM6 of TMEM16A with that of other family members ([Figure 2A](#)) demonstrates that it is particularly well conserved in TMEM16B, a highly similar CaCC. A model based on an atomic resolution cryo-EM structure of TMEM16A in nanodiscs was used to map the pore-lining surface in dark gray ([Figure 2B](#)). Reasoning that TM6 at the interface between the permeation path and the  $\text{Ca}^{2+}$ -binding site is ideally situated to contribute to channel gating, we performed alanine scanning mutagenesis of TM6 ([Figure 2A](#)). Of the 28 mutant constructs tested in HEK293 cells, 25 produced observable currents in inside-out patches exposed to  $\text{Ca}^{2+}$  from the cytoplasmic side and held at +60 mV. Of the remaining three constructs with negligible currents, two (M638A and P654A) appeared to be poorly trafficked to the membrane, while L643A reached the membrane but was electrically non-functional ([Figures S2A and S2B](#)). To characterize channel mutants, we exposed inside-out membrane patches from HEK293 cells to a series of solutions containing fixed concentrations of  $\text{Cl}^-$  ions but increasing concentrations of free  $\text{Ca}^{2+}$  ions (see sample traces in [Figure 2C](#)). We normalized the currents at various  $\text{Ca}^{2+}$  concentrations to current amplitude at a saturating concentration of  $\text{Ca}^{2+}$  (1 mM for most constructs; 10 mM for E650A) and fitted with sigmoidal concentration-response curves ([Equation 1](#) in [STAR Methods](#)) to derive the  $\text{EC}_{50}$ s and Hill coefficients ([Figures 2D and 2E](#)). Mutation at a known  $\text{Ca}^{2+}$ -binding residue, E650 ([Tien et al., 2014](#); [Dang](#)

[et al., 2017](#)), and two asparagine residues, one of which may represent a sixth  $\text{Ca}^{2+}$ -binding residue ([Brunner et al., 2014](#); [Dang et al., 2017](#)), produced significant reductions in  $\text{Ca}^{2+}$  sensitivity (red bars with black hash marks). Numerous other residues N-terminal to the  $\text{Ca}^{2+}$ -binding residues of TM6 also produced statistically significant reductions in apparent  $\text{Ca}^{2+}$  sensitivity ([Figure 2D](#)). However, we also noticed that several residues within TM6 increased apparent  $\text{Ca}^{2+}$  sensitivity, including some that significantly reduced the Hill coefficient ([Figure 2E](#)). Because these mutated residues are not implicated in  $\text{Ca}^{2+}$  binding, we hypothesized that they may increase apparent  $\text{Ca}^{2+}$  sensitivity by producing conformational changes that facilitate either  $\text{Ca}^{2+}$  ion binding or channel activation after  $\text{Ca}^{2+}$  binding.

#### Alanine Substitution of I637 or Q645 in TM6 Enhances Calcium Sensitivity and Enables Channel Activation in the Absence of Internal Calcium

Next, we characterized mutants resulting in significant increases in apparent  $\text{Ca}^{2+}$  sensitivity, reasoning that they were likely involved in channel gating rather than directly affecting  $\text{Ca}^{2+}$  binding. We tested all such alanine mutant constructs in  $\text{Ca}^{2+}$ -free internal solutions using whole-cell patch clamp. Remarkably, I637A and Q645A, the two mutations producing the largest sensitizing shifts, resulted in an outward-rectifying current-voltage relationship within the physiological range in the absence of  $\text{Ca}^{2+}$  ([Figures 3A–3C](#)). Channels with mutations at G640, K641, L648, and I653 remained incapable of opening in the absence of  $\text{Ca}^{2+}$  up to +200 mV ([Figures S3A and S3B](#)). We confirmed the bona fide “ $\text{Ca}^{2+}$ -independent” activation in Q645A by showing that channel activity remained the same with 5 mM BAPTA and 1 mM EDTA added to our normal “ $\text{Ca}^{2+}$ -free solution” (which contained 5 mM EGTA) and with omission of  $\text{Mg}^{2+}$  ions, which do not normally activate TMEM16A ([Ni et al., 2014](#)), out of concern that the mutation may have sensitized the channel to  $\text{Mg}^{2+}$ . In addition, equivalent mutations in the TMEM16B channel also exhibited  $\text{Ca}^{2+}$ -independent activation, albeit requiring more depolarizing voltages and producing smaller apparent whole-cell currents ([Figures S3C and S3D](#)). To confirm that these mutations changed TMEM16A-gating properties while preserving its channel permeation characteristics, we performed non-stationary fluctuation analysis of Q645A ([Figures S4A and S4B](#)) ([Heinemann and Conti, 1992](#)) and showed that the single-channel conductance of Q645A was  $3.2 \pm 0.4$  pS, which is comparable to that of WT at  $2.8 \pm 0.5$  pS ([Figure S4C](#)) and consistent with previous reports ([Manoury et al., 2010](#); [Lim et al., 2016](#); [Ta et al., 2016](#)). We also exposed this channel to a series of bi-ionic anion replacement solutions with internal solutions

(C) Sample traces of inside-out patches pulled from HEK293 cells expressing the indicated construct and exposed to a series of increasing  $\text{Ca}^{2+}$  concentrations at +60 mV. Solutions a–f contained 150 nM, 300 nM, 400 nM, 600 nM, 5.5  $\mu$ M, and 1 mM  $\text{Ca}^{2+}$ , respectively.

(D)  $\text{EC}_{50}$  values for  $\text{Ca}^{2+}$  concentration-response relationships from curves fit to traces as in (C), with statistically significant right shifts highlighted in red and significant left shifts highlighted in blue. Bars for residues that may directly coordinate  $\text{Ca}^{2+}$  ions are shown with diagonal hatches. “N.C.” for constructs with protein expression but no current (see also [Figure S2](#)). n for WT, 19; L627A, 6; M628A, 5; E629A, 6; L630A, 6; C631A, 5; I632A, 8; Q633A, 4; L634A, 10; S635A, 9; I636A, 10; I637A, 8; L639A, 6; G640A, 9; K641A, 8; Q642A, 6; I644A, 8; Q645A, 7; N646A, 4; N647A, 5; L648A, 6; F649A, 7; E650A, 4; I651A, 10; G652A, 10; and I653A, 11.

(E) Hill coefficients for fits as in (D), with significant increased highlighted in red and significant decrease highlighted in blue.  $\text{EC}_{50}$  values and Hill coefficients were compared using one-way ANOVA followed by a Bonferroni post hoc test for statistical significance.

Data in (D) and (E) are expressed as mean  $\pm$  SEM.



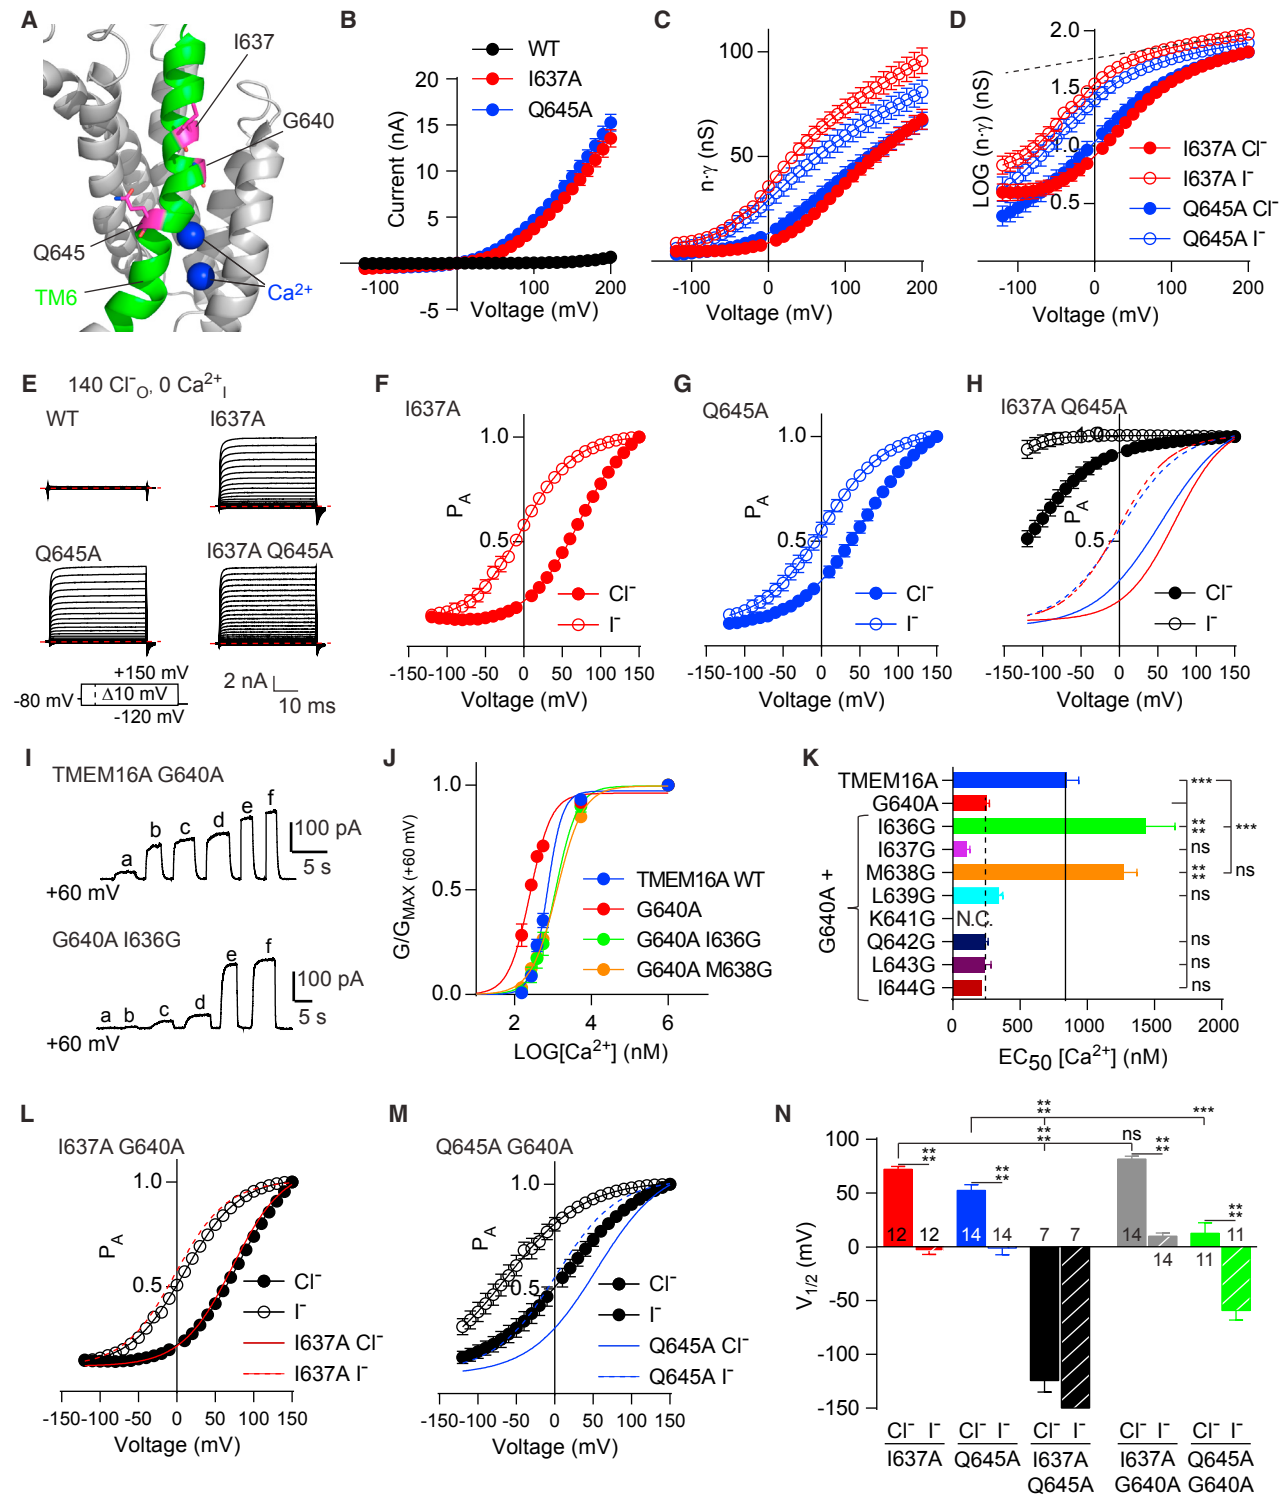

**Figure 3. Alanine Substitutions for I637 and Q645 in TM6 Allow Outward-Rectifying Anion Conductance in the Absence of Internal  $\text{Ca}^{2+}$  and Are Functionally Asymmetric Following Removal of the G640 Hinge**

(A) Image of TMEM16A highlighting the position (in purple) of I637, G640, and Q645 in TM6 (green) with bound  $\text{Ca}^{2+}$  (blue).

(B) Current-voltage (IV) relationships for WT, I637A, and Q645A TMEM16A with 0 nM internal  $\text{Ca}^{2+}$  reveal that the I637A and Q645A mutations remove the requirement for  $\text{Ca}^{2+}$  for activation (see also Figure S3) as revealed by whole-cell patch clamp, using 10 mV voltage steps from -120 mV to +150 mV from a holding potential of -80 mV.

(legend continued on next page)

containing  $\text{Cl}^-$  and external solutions containing another anion species or 14 mM NaCl supplemented with D-mannitol and found a selectivity sequence among the anions tested of  $\text{P}_I > \text{P}_{\text{Cl}} > \text{P}_F > \text{P}_{\text{MES}} > \text{P}_{\text{Aspartate}} > \text{P}_{\text{Glucuronate}}$  and a  $\text{P}_{\text{Na}^+}/\text{P}_{\text{Cl}^-}$  of 0.10 (Figures S4D–S4F), consistent with previous findings for WT TMEM16A. Finally, we compared the conductance-voltage relationships of Q645A exposed to NaCl and NMDG-Cl and found no change in the waveform, suggesting that the monovalent cationic species did not influence the conductance-voltage relationship. Taken together, these results suggest that TM6 mutations are capable of shifting  $\text{Ca}^{2+}$  sensitivity and allowing the mutant channel to activate in the absence of  $\text{Ca}^{2+}$  at depolarizing voltages without affecting ion selectivity or the single-channel conductance.

### Permeant Anions Potentiate Conductance via an Externally Situated Binding Site

Notably, the two mutants with sensitizing shifts in both voltage-dependent and  $\text{Ca}^{2+}$ -dependent gating remained sensitive to the concentration and identity of external anionic species, similar to an effect seen previously for heterologously expressed TMEM16A and endogenous CaCC in *Xenopus* oocytes (Perez-Cornejo et al., 2004; Contreras-Vite et al., 2016). Furthermore, plotting I637A and Q645A whole-cell conductances for  $\text{Cl}^-$  and  $\text{I}^-$  against voltage revealed that the channel open probability ( $\text{P}_o$ ) did not saturate even at strongly depolarizing (e.g., +150 mV) potentials (Figure 3C). When plotted with a semi-Log ordinate, normalized G-V increased linearly with voltage even at strongly depolarizing potentials (Figure 3D), unlike outwardly rectifying potassium channels (Zagotta et al., 1994) with  $\text{P}_o$  approaching 1 under depolarizing conditions due to full activation of all voltage sensors. Replacing external  $\text{Cl}^-$  with  $\text{I}^-$  caused the G-V curve to shift leftward while retaining a positive slope (Figure 3D). These results implicate the involvement of anions with a binding site accessible to the external medium in a rate-limiting process for the apparent voltage dependence of channel conductance.

To parse the effects of external anion binding, we recorded whole-cell currents of Q645A with internal  $\text{Cl}^-$  replaced with

aspartate ions that cannot easily pass through CaCCs to yield near unidirectional anionic fluxes with amplitudes proportional to the  $k_{\text{ON}}$  of anions from the extracellular milieu to an external binding site. As  $k_{\text{ON}}$  is also dependent on the concentration of anions in the bulk external solution, we applied varying concentrations of  $\text{Cl}^-$  or  $\text{I}^-$  and quantified an  $\text{EC}_{50}$  for each anion at a series of strongly depolarizing voltages to eliminate the trace influence of internal anions (Figures S5A–S5C). Subsequently, these  $\text{EC}_{50}$ s were Log transformed and fit with Equation 2 (in STAR Methods) to establish the depth in the voltage field of this anion-sensitive site for channel potentiation (Figure S5D). The linear fits to these points yielded an apparent voltage dependence ( $z\delta$ ) of  $0.058 \pm 0.013$  for  $\text{Cl}^-$  and  $0.057 \pm 0.012$  for  $\text{I}^-$ . We reasoned that the outermost site of channel interaction with anions likely exists at that depth, consistent with a previous finding suggesting a shallow anion-binding site and pore-blocking site accessible from the extracellular space (Peters et al., 2015). Moreover, we reasoned that  $\text{I}^-$  binds to the same site with higher affinity than  $\text{Cl}^-$  because both ions had the same voltage dependence.

### Permeant Anions and Intracellular Calcium Affect an Innate Voltage-Dependent Gating Process of TMEM16A

We next sought to separate the effects of the modulatory site from other intrinsic components of the overall conductance-voltage relationship. We reasoned that eliminating  $\text{Ca}^{2+}$ -dependent gating should allow us to probe whether additional voltage sensitivity exists, so we examined I637A and Q645A mutant channel activation in the absence of intracellular  $\text{Ca}^{2+}$ . By fitting the whole-cell G-V curves between +150 and +180 mV in the presence of external  $\text{Cl}^-$  or  $\text{I}^-$  with Equation 2 and using  $z\delta = 0.06$  to establish an upper limit for the slope of the semi-Log plot, we could separate values for the apparent anion-dependent effect producing non-saturating conductance at extreme depolarizations from a residual voltage dependence of the channel (Figures 3E–3G). Fitting this voltage dependence with a two-state Boltzmann relationship (Equation 3 in STAR Methods) suggests that the mutant channel itself undergoes a discrete voltage-dependent rearrangement, henceforth referred to as

(C) Conductance-voltage (G-V) relationships for I637A (red) and Q645A (blue) derived from the IV curves shown in (B), with filled circles depicting data gathered with chloride and open circles with iodide as the external anion.

(D)  $\text{Log}_{10}$  transformation of the data in (C) with gray dashed line indicating a non-saturating conductance at the highest positive voltages. G-V traces corrected for external anion dependence can then be fit with a two-state Boltzmann relationship (see also Figure S5).

(E) Sample traces from whole-cell patch-clamp recording of HEK293 cells expressing WT TMEM16A or channels bearing either or both Q645A and I637A mutations exposed to a series of voltage commands from a holding potential of  $-80$  mV with external chloride and 0 nM internal  $\text{Ca}^{2+}$ . Red dashed lines indicate 0 nA.

(F–H) Graphs depicting normalized G-V relationships after subtraction of non-saturating conductance (“Probability-activated” or  $\text{P}_A$ ) reveal conductances with Boltzmann profiles for the I637A (F), Q645A (G), and I637A Q645A (H) mutant TMEM16A constructs. Solid lines in (H) represent  $\text{P}_A$  with chloride and dashed lines with iodide as the permeant anion, from curves fit in (F) and (G).

(I) Sample traces of inside-out patches exposed to a series of increasing  $\text{Ca}^{2+}$  concentrations at +60 mV. Solutions a–f contained 150 nM, 300 nM, 400 nM, 600 nM, 5.5  $\mu\text{M}$ , and 1 mM  $\text{Ca}^{2+}$ , respectively.

(J) Graph derived from data shown in (I) revealing the change in conductance with increasing  $\text{Ca}^{2+}$ . The G640A mutation increases sensitivity to  $\text{Ca}^{2+}$ , but mutating I636 or M638 to Gly restores the normal  $\text{Ca}^{2+}$  sensitivity.

(K) Bar graph showing that only the I636G and M638G mutations can rescue the G640A mutation. n was WT, 19; G640A, 9; GA I636G, 11; GA I637G, 4; GA M638G, 5; GA L639G, 4; GA A642G, 5; GA L643G, 6; GA I644G, 4.

(L and M)  $\text{P}_A$  versus voltage relationships comparing the effect of I637A (L) and Q645A (M) mutations in the G640A background, with solid lines depicting the fits to I637A or Q645A mutations alone.

(N) A comparison of fitted  $V_{1/2S}$  for combinations of I637A, Q645A, and G640A representing information presented in panels (F)–(H), (L), and (M).

Data are expressed as mean  $\pm$  SEM, and where error bars are invisible, they are contained within the points.

See also Figures S3–S5.

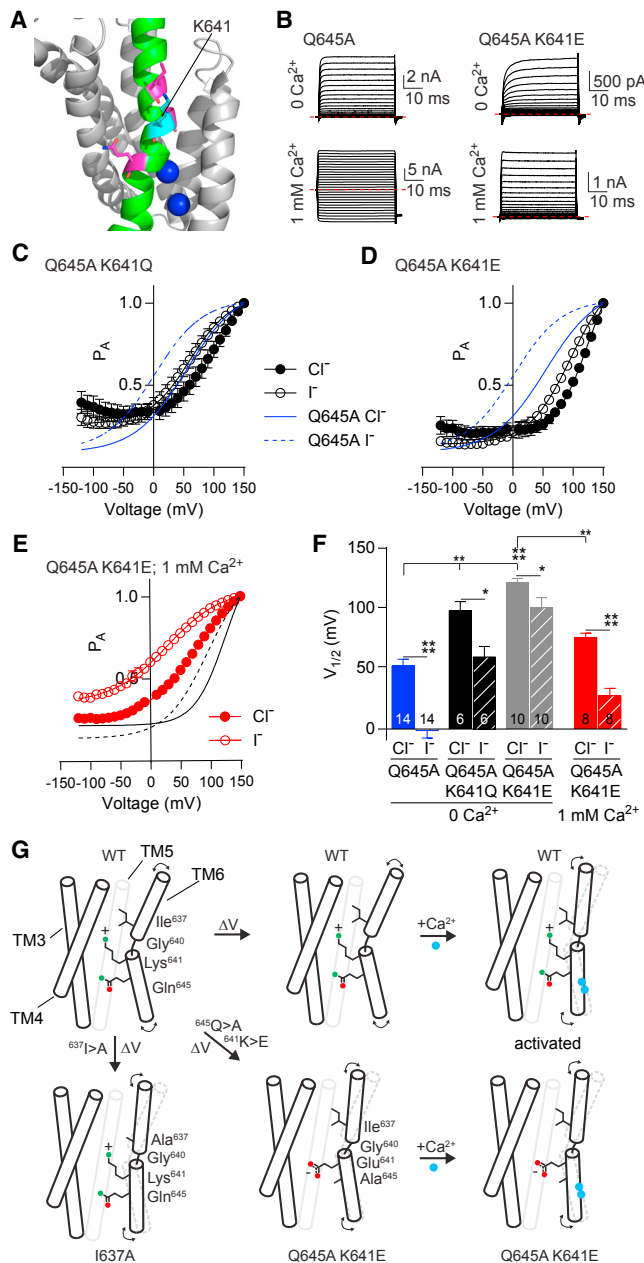

**Figure 4. Neutralization and Charge Reversal of K641 in TM6 Shifts the Voltage Dependence of TMEM16A and Is Sensitive to the Presence of  $\text{Ca}^{2+}$**

(A) Image of TMEM16A highlighting the positions of K641 (cyan) in TM6 with bound  $\text{Ca}^{2+}$  indicated in blue.  
 (B) Sample traces from whole-cell patch-clamp recording of HEK293 cells expressing TMEM16A with the Q645A mutation (left) or Q645A and K641E mutations (right), stepped from  $-120$  mV to  $+150$  mV in 10 mV steps from a holding potential of  $-80$  mV. Chloride was the permeant anion in each case, with 0 nM internal  $\text{Ca}^{2+}$  used in the top row and 1 mM  $\text{Ca}^{2+}$  used in the bottom row. Red dashed lines indicate 0 nA.  
 (C and D) Graphs showing the  $P_A$ -V relationship for TMEM16A Q645A K641Q (C) and Q645A K641E (D), with blue lines indicating fits to the Q645A single mutant. K641Q shifts the curve to the right and K641E causes a greater shift.  
 (E)  $P_A$ -V relationship of Q645A K641E mutant with 1 mM  $\text{Ca}^{2+}$  resembles that of the Q645A single mutant. Solid and dashed lines indicate the fit to

“ $P_A$ ” for the voltage-dependent probability of the channel being in the activated conformation. TMEM16A I637A has a  $V_{1/2}$  of  $72.2 \pm 2.7$  mV ( $n = 12$ ) while Q645A has a  $V_{1/2}$  of  $52.6 \pm 5.3$  mV ( $n = 14$ ) in the presence of  $\text{Cl}^-$ . Replacement of  $\text{Cl}^-$  with  $\text{I}^-$  led to a significant left shift in  $V_{1/2}$  in I637A to  $-3.6 \pm 3.4$  mV ( $n = 12$ ) and in Q645A to  $-1.1 \pm 6.2$  mV ( $n = 13$ ) (Figures 3F and 3G). Thus, extracellular anions permeating through the pore influence its intrinsic voltage-dependent gating, independent of  $\text{Ca}^{2+}$  occupancy of the mutant channel. We then examined the double mutant I637A Q645A and found a negative shift in the voltage dependence compared to that of either single mutant (Figures 3H and 3N). This result suggests that these two mutations likely introduce separate, distinguishable changes to gating stemming from movements of or about TM6.

It was notable that alanine substitution for the G640 residue between I637 and Q645 also increased  $\text{Ca}^{2+}$  sensitivity (Figure 2D). Glycine residues found along the pore-lining helices of ion channels such as KcsA and the Shaker family potassium channels are implicated as hinge-bending elements crucial for channel gating (Jiang et al., 2002; Ding et al., 2005). Typically glycine-to-alanine mutations would reduce hinge bending. Remarkably, G640A facilitated activation of the TMEM16A by  $\text{Ca}^{2+}$ . This raises the possibility that if G640 acts as a flexible hinge or inflection point, it may favor a closed channel conformation or hamper  $\text{Ca}^{2+}$  binding. We tested whether the reintroduction of glycine nearby could restore normal  $\text{Ca}^{2+}$  dependence and found that two double mutations of G640A, with I636G or M638G, both decreased  $\text{Ca}^{2+}$  sensitivity to near WT levels (Figures 3I–3K). Thus, the presence of a glycine at or near position 640 is important for  $\text{Ca}^{2+}$ -dependent gating at physiologically relevant  $\text{Ca}^{2+}$  concentrations. We next asked whether this glycine might also contribute to the equilibrium of voltage-dependent gating of I637A or Q645A. Recording of double mutants I637A G640A or Q645A G640A in  $\text{Ca}^{2+}$ -free solutions in whole-cell patch-clamp conditions revealed that G640A imparted an additional left shift in voltage dependence to Q645A, but not I637A (Figures 3L–3N). This result suggests that the flexible hinge afforded by G640 plays a role in Q645A, but not I637A, channel gating, further reinforcing the notion that TM6 likely undergoes at least two sequential movements during voltage-dependent gating.

#### A Lysine in TM6 Contributes Voltage Dependence to TMEM16A Activation

The  $\text{Ca}^{2+}$  sensitivity was increased by alanine substitution for the K641 basic residue within the pore region (Figures 2D and 4A), which has been implicated in both anion conductance and gating of the channel (Peters et al., 2015). Because the double mutant of K641A with Q645A did not show expression in

Q645A K641E with 0 mM  $\text{Ca}^{2+}$  and external chloride (solid) or iodide (dashed).

(F) A bar graph comparing the  $V_{1/2}$ s of Boltzmann fits to the  $P_A$ -V curves in (C)–(E).

(G) Schematic depicting possible changes in TMEM16A conformation after depolarization or  $\text{Ca}^{2+}$  binding. Position of residues and side chains do not reflect actual structure and are meant to be illustrative.

Data are expressed as mean  $\pm$  SEM, and where error bars are invisible, they are contained within the points.



HEK293 cells, we examined the charge neutralization and charge reversal double mutant constructs Q645A K641Q and Q645A K641E using whole-cell patch clamp in  $\text{Ca}^{2+}$ -free internal solution (Figure 4B) and found significant right shifts to the voltage-dependent  $P_A$  (Figures 4C, 4D, and 4F). These shifts persisted even when extracellular  $\text{Cl}^-$  was replaced by  $\text{I}^-$ , albeit with smaller magnitudes. Furthermore, Q645A K641E exhibited a left shift in  $P_A$  in the presence of 1 mM intracellular  $\text{Ca}^{2+}$  similar to that in  $\text{Ca}^{2+}$ -free solutions (Figures 4E and 4F). However,  $\text{Ca}^{2+}$  ions were no longer able to push the channel to its “Ohmic” conformation or to relieve the dependence of  $P_A$  on external anionic species as observed in the WT channel with high  $\text{Ca}^{2+}$ . Taken together, these results suggest that K641 at the lower end of TM6 is critical for regulating the dependence of channel gating on voltage,  $\text{Ca}^{2+}$ , and anions (Figure 4G).

### Mutation of Calcium-Binding Residues Shifts TMEM16A Voltage Dependence

TM6 harbors 2 of the 6 aa critical for coordinating  $\text{Ca}^{2+}$ , including 5 acidic residues and an asparagine. Having found that both N646 and N647 produced right shifts in the  $\text{EC}_{50}$  for  $\text{Ca}^{2+}$  (Figure 2D), we examined aspartate substitution for either asparagine using inside-out patch-clamp electrophysiology to test whether introduction of an additional negative charge to the  $\text{Ca}^{2+}$ -binding sites causes a sensitizing shift in the  $\text{EC}_{50}$  for  $\text{Ca}^{2+}$ . N646D, but not N647D, caused a potent increase in  $\text{Ca}^{2+}$  sensitivity ( $\text{EC}_{50}$ :  $216 \pm 15$  nM [ $n = 9$ ]; Figures S6A and S6B), consistent with the observation that N646 participates in  $\text{Ca}^{2+}$  binding (Dang et al., 2017) (Figure 5A). As I637A and Q645A are mutations within TM6 capable of facilitating activation of the channel in the absence of  $\text{Ca}^{2+}$  ions, they also provided the opportunity to parse the role of  $\text{Ca}^{2+}$  from the voltage dependence of this domain.  $P_A$  of I637A N646A and I637A E650A double mutants in  $\text{Ca}^{2+}$ -free solutions was the same as that of I637A single mutant (Figure 5B). Conversely, both N646A and E650A produced strong sensitizing shifts in  $P_A$  when placed in the Q645A background (Figure 5C). We considered two possible explanations for this phenomenon: either these  $\text{Ca}^{2+}$ -binding residues represent negative “gating charges” or the absence of  $\text{Ca}^{2+}$  in its binding site results in destabilization of the configuration of the  $\text{Ca}^{2+}$ -binding sites due to electrostatic or steric effects. As N646 is not charged, we favored the second explanation, and to test it, we made additional double mutants of Q645A with the remaining  $\text{Ca}^{2+}$ -binding residues. Q645A E698A appeared similar to WT, but Q645 E701A, Q645A E730A, and Q645A D734A all resulted in strong sensitizing shifts in  $P_A$  (Figures 5D–5F), supporting the notion that the negative charges on these residues may repel each other in the absence of  $\text{Ca}^{2+}$  as a stabilizing ligand. Indeed, E698A is spatially removed from the other five residues and is likely to only interact with one of the two  $\text{Ca}^{2+}$  ions, while E650, E701, and E730 form a ring (Figure 5A, lower panel) and are likely to interact with both  $\text{Ca}^{2+}$  ions.

### Crosstalk between Voltage- and Calcium-Dependent Gating in TMEM16A

To investigate the interaction between voltage and  $\text{Ca}^{2+}$  in the WT channel, we used an internal solution containing

400 nM  $\text{Ca}^{2+}$  to activate the channel and estimated the voltage-dependent  $P_A$  as before and found that the WT TMEM16A had a residual voltage dependence (Figures 6A and 6C). As in Q645A, WT TMEM16A showed differential gating effects for  $\text{Cl}^-$  and  $\text{I}^-$ , as external  $\text{I}^-$  caused a desensitizing shift in  $P_A$  (Figures 6A and 6C). We then examined how  $P_A$  varied with  $\text{Ca}^{2+}$ . Reducing intracellular  $\text{Ca}^{2+}$  to 200 nM caused a right shift whereas increasing intracellular  $\text{Ca}^{2+}$  to 1,500 nM led to a left shift in  $P_A$  (Figures 6B and 6C), suggesting that voltage and  $\text{Ca}^{2+}$  likely combine to determine the conformation of TM6.

Having found that both voltage and  $\text{Ca}^{2+}$  play a role in TM6-dependent gating, we varied holding potentials and pulse durations to probe the time dependence of gating effects in WT TMEM16A to ascertain how these two stimuli interact to produce the complex gating behavior. Notably, the WT channel exhibits a markedly biphasic activation upon depolarization, with an apparent “instantaneous” ( $I_{\text{inst}}$ ) component followed by a second, more slowly activating component (Figure 6D). First, TMEM16A in whole-cell clamp exposed to 400 nM intracellular  $\text{Ca}^{2+}$  was held at a series of pre-pulse voltages. We then stepped the membrane potential to a suprathreshold range in 10 mV intervals and compared the size of  $I_{\text{inst}}$  immediately following the voltage jumps. Only a small fraction of the current was activated very quickly from  $-120$  mV (Figure 6D, left panel arrows): mean  $I_{\text{inst}}$  activated upon pulse to  $+120$  mV was  $0.09 \pm 0.01$  of the size of the steady-state current at  $+120$  mV, where the driving force for  $\text{Cl}^-$  is the same size. As this  $I_{\text{inst}}$  activates upon depolarization, we propose that it represents a fraction of channels with a single  $\text{Ca}^{2+}$  ion bound that are closed but “primed” for activation upon depolarization. Following the step to  $+120$  mV, activation to another open state with a slower time course can then proceed (see Figure 6D, inset). When these same cells were held at  $+120$  mV prior to the voltage steps and then stepped from  $+120$  mV back to  $-120$  mV, the inward  $I_{\text{inst}}$  was  $0.86 \pm 0.02$  the magnitude of the steady-state current at  $+120$  mV, demonstrating that prolonged activation at  $+120$  mV allows a much larger inward  $I_{\text{inst}}$  current to be briefly observed following steps to negative potentials. Instantaneous current amplitudes from different pre-pulse holding potentials normalized against the baseline activation at  $+120$  mV are shown in Figure 6E.

In contrast, when the same experiment is performed with the outwardly rectifying Q645A mutant in the absence of internal  $\text{Ca}^{2+}$ ,  $I_{\text{inst}}$  at  $+120$  mV following a  $-120$  mV pre-pulse was  $0.65 \pm 0.04$  of the steady state at  $+120$  mV (Figure 6F), while the inward  $I_{\text{inst}}$  amplitude at  $-120$  mV following a  $+120$  mV pre-pulse was  $0.29 \pm 0.05$  of the magnitude at  $+120$  mV. Thus, while Q645A channels can be more quickly activated from a  $-120$  mV holding potential by depolarization, prolonged depolarization does not stabilize a conformation that allows for prolonged inward current (Figure 6G). Reasoning that this likely resulted from the absence of  $\text{Ca}^{2+}$  binding, we performed a similar analysis of  $I_{\text{inst}}$  using the  $\text{Ca}^{2+}$ -binding mutant E650A in the presence of 1 mM internal  $\text{Ca}^{2+}$ . Under these conditions, E650A demonstrated  $I_{\text{inst}}$  of  $0.80 \pm 0.09$  of the  $+120$  mV steady-state magnitude when pulsed from  $-120$  mV, but only  $0.21 \pm 0.03$  in the inward direction when pulsed to  $-120$  mV from  $+120$  mV, and indeed, the  $I_{\text{inst}}$  magnitude appeared identical at every pulse

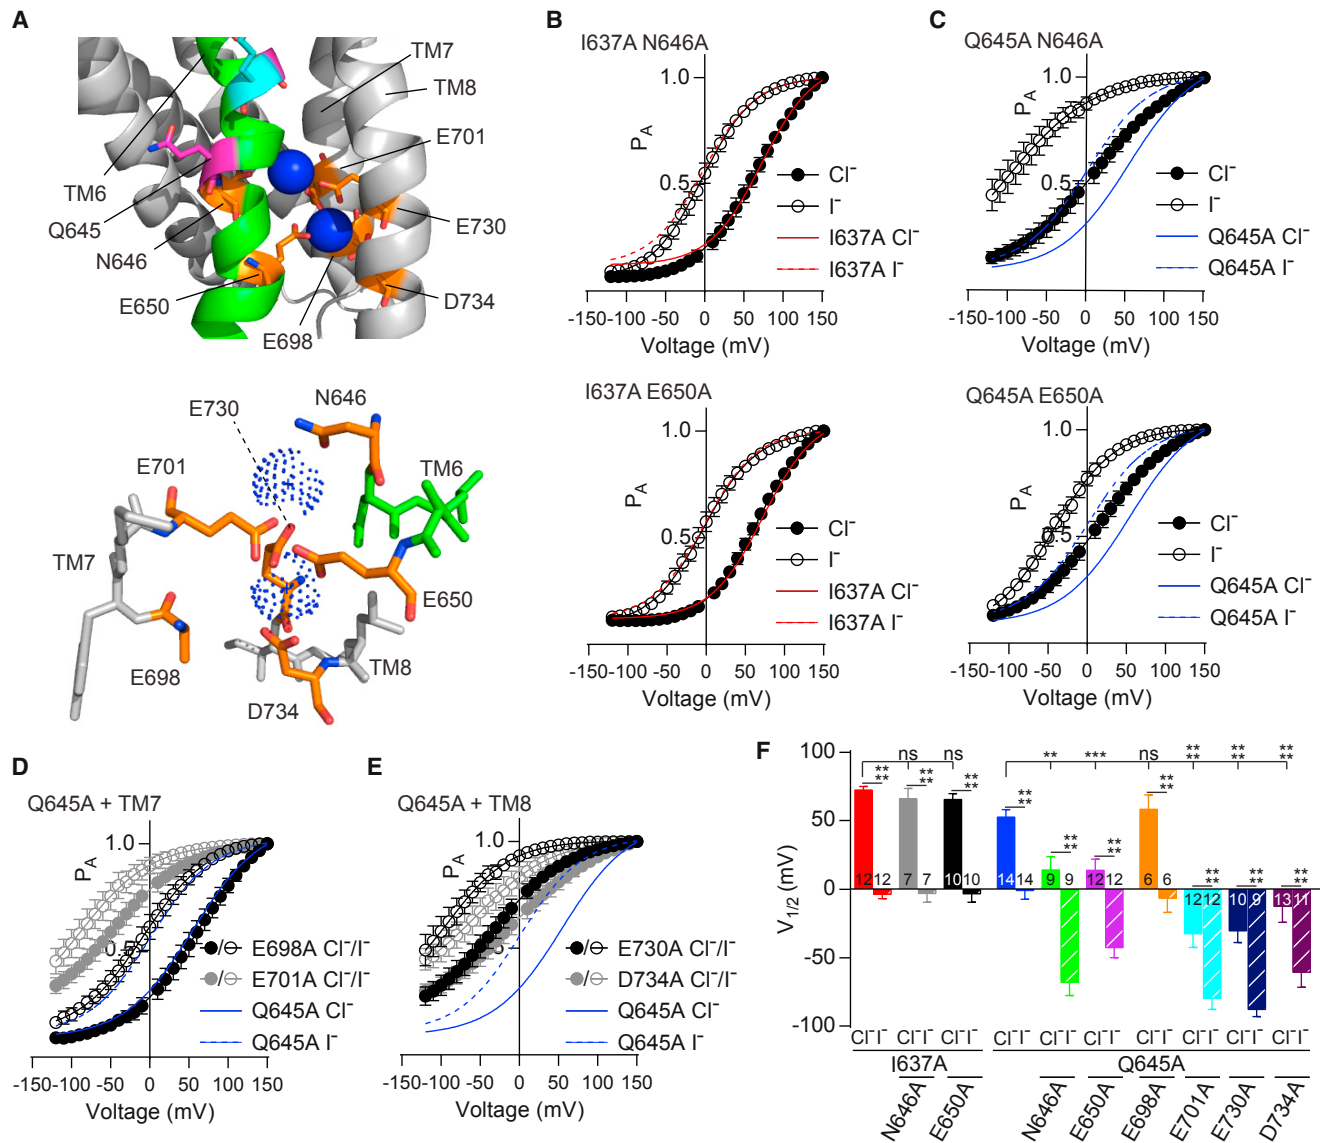

**Figure 5. I637 and Q645 Are Differently Affected by Mutations in the Ca<sup>2+</sup>-Binding Pocket**

(A) A close view of the Ca<sup>2+</sup>-binding pocket of TMEM16A with TM6 in green, Q645 in purple, I637 in cyan, residues interacting with Ca<sup>2+</sup> in orange, and Ca<sup>2+</sup> in blue. (B and C) P<sub>A</sub>-V relationships of the I637A (B) and Q645A (C) TMEM16A mutants bearing additional TM6 mutations of the Ca<sup>2+</sup>-binding residues N646 (top) and E650 (bottom). N646A or E650A does not affect the voltage dependence of the I637A mutant but causes a left shift in the Q645A mutant. Red and blue lines depict the fits to I637A (red) or Q645A (blue) single mutants for comparison.

(D and E) Graphs showing P<sub>A</sub>-V relationships of the Q645A mutant with mutations of Ca<sup>2+</sup>-binding residues in TM7 (D) and TM8 (E) reveal that mutations in TM7 and TM8 create left shifts in the Q645A mutant background, with the exception of E698.

(F) A bar graph comparing the V<sub>1/2S</sub> of Boltzmann fits to the P<sub>A</sub>-V curves of (B)–(E).

Data are expressed as mean ± SEM, and where error bars are invisible, they are contained within the points.

See also Figure S6.

voltage independent of pre-pulse level (Figures S7A and S7B). We propose that E650A eliminates one of the two Ca<sup>2+</sup>-binding sites, and for the WT channel, initial Ca<sup>2+</sup> binding influences TM6 to adopt a conformation that permits binding of the second Ca<sup>2+</sup>. Moreover, TM6 movement is voltage dependent, and all three steps (first Ca<sup>2+</sup> binding, TM6 movement, and second Ca<sup>2+</sup> binding) are required for full activation.

Next, we probed the kinetics of activation and deactivation after prolonged periods of activation (at +120 mV) or deactivation (at -120 mV) (Figure 6H). We fit time constants to these time courses to estimate activation and deactivation rates (using Equations 4.1 and 4.2 in STAR Methods), the onset of the slow component of deactivation (Figure 6H, top panels, arrows), and the loss of instantaneous current after activation (Figure 6H,

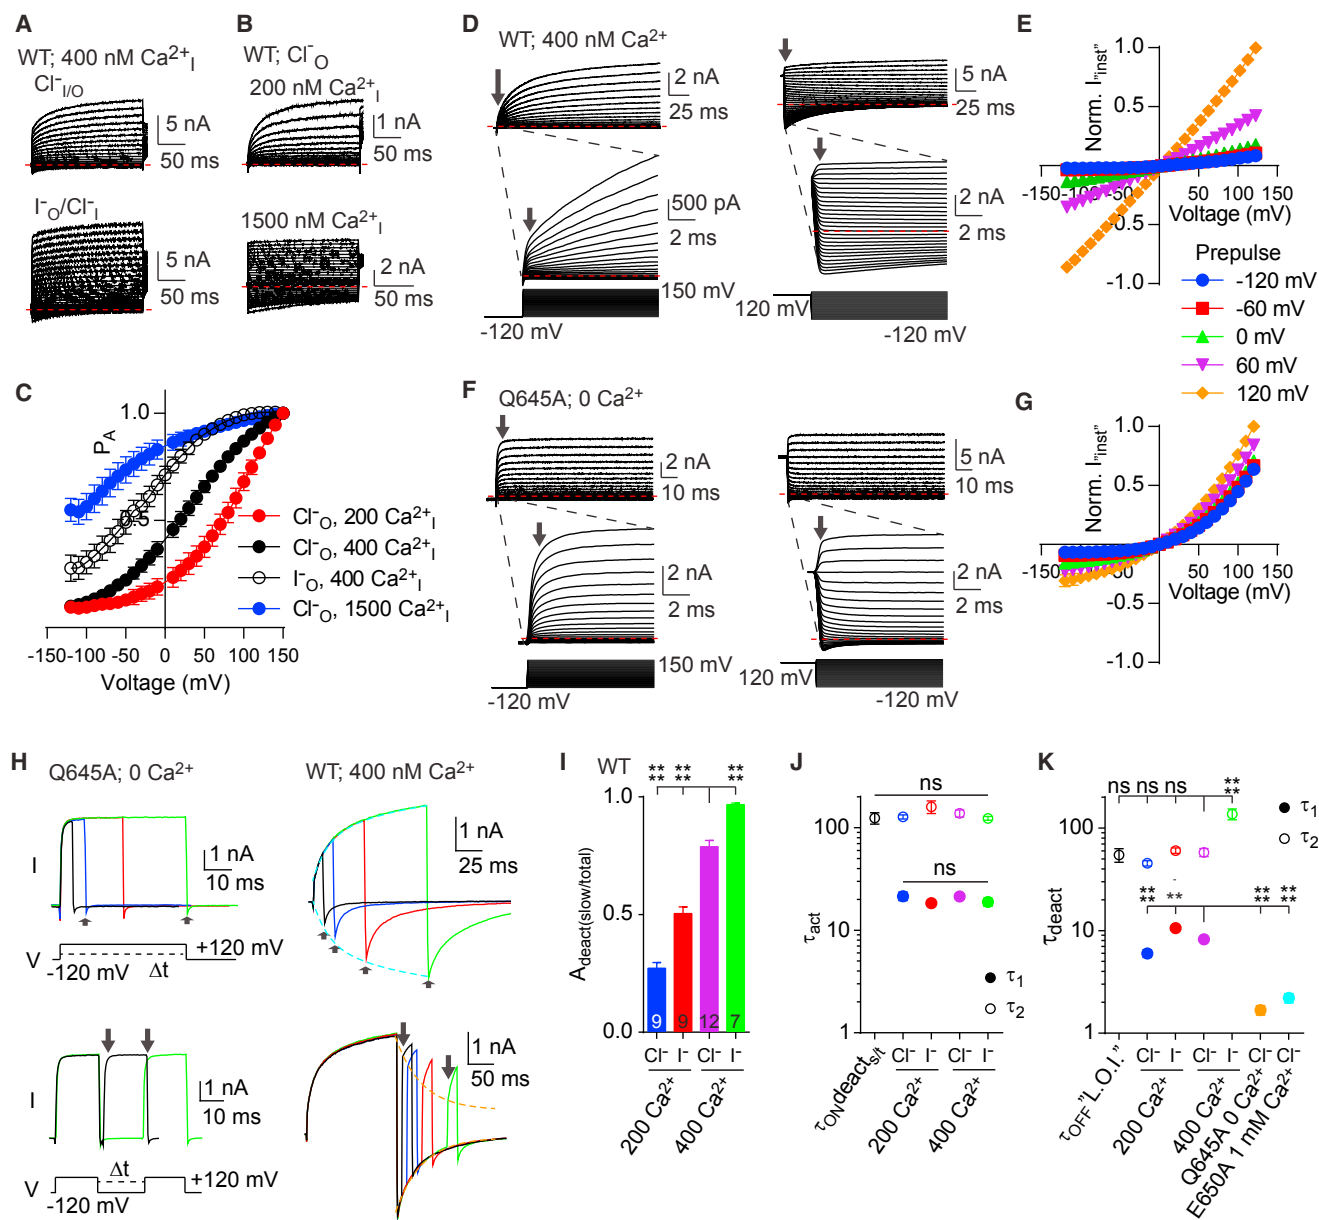

**Figure 6. Depolarization of TMEM16A Channels Causes a  $\text{Ca}^{2+}$ -Dependent Stabilization of Open Conformation and Slowing of Deactivation Kinetics**

(A) Representative traces of whole-cell patch-clamp recordings of WT TMEM16A with 400 nM internal  $\text{Ca}^{2+}$  with external chloride (top) or iodide (bottom).  
 (B) Representative traces of whole-cell patch-clamp recordings of WT TMEM16A with external chloride and 200 nM (top) or 1,500 nM (bottom) internal  $\text{Ca}^{2+}$ . In both (A) and (B), cells were stepped from  $-120$  mV to  $+150$  mV in 10 mV increments from a holding potential of  $-80$  mV.  
 (C) Graph of  $P_A$ -V for data represented in (A) and (B) showing a progressive left shift in the voltage dependence upon increasing internal concentration of  $\text{Ca}^{2+}$ . n was 200  $\text{Ca}^{2+}$   $\text{Cl}^-_o$ , 5; 400  $\text{Ca}^{2+}$   $\text{Cl}^-_o$ , 5; 400  $\text{Ca}^{2+}$   $\text{I}^-_o$ , 8; 1,500  $\text{Ca}^{2+}$   $\text{Cl}^-_o$ , 7.  
 (D) WT TMEM16A with 400 nM internal  $\text{Ca}^{2+}$  voltage clamped from a pre-pulse potential of  $-120$  mV (left) or  $+120$  mV (right). Inset shows current immediately after voltage steps.  
 (E) “Instantaneous” current amplitudes from WT at voltages from  $-120$  to  $+120$  after pre-pulses to the indicated voltages, normalized to amplitude at  $+120$  mV, n = 5.  
 (F) Q645A with 0 internal  $\text{Ca}^{2+}$  stepped under voltage clamp from a pre-pulse potential of  $-120$  mV (left) or  $+120$  mV (right). Inset shows current immediately after voltage steps.  
 (G) “Instantaneous” current amplitudes from Q645A at voltages from  $-120$  mV to  $+120$  mV after pre-pulses to the indicated voltages, normalized to amplitude at  $+120$  mV, n = 5 (see also Figure S7).

(legend continued on next page)

bottom panels, arrows). We found that for Q645A with no internal  $\text{Ca}^{2+}$ ,  $I_{\text{inst}}$  remained constant following activation for different durations, and the time course of deactivation exhibits a single, “fast” exponential decay even after prolonged depolarizing pulses. In contrast, WT TMEM16A with 400 nM intracellular  $\text{Ca}^{2+}$  showed pronounced biphasic activation at +120 mV (Figure 6H, see also Figure 6D), and increasing the duration of this pulse before hyperpolarization to –120 mV increased the relative contribution of a more slowly deactivating component at –120 mV. Quantification of the fast and slow components of the deactivating current following a 300 ms pulse to +120 mV revealed that substituting  $\text{Cl}^-$  with  $\text{I}^-$  further increased the relative contribution of slow deactivation (Figure 6I). Conversely, reducing intracellular  $\text{Ca}^{2+}$  from 400 nM to 200 nM decreased the relative contribution of slow deactivation with either  $\text{Cl}^-$  or  $\text{I}^-$  as the external anion (Figure 6I). Thus, the rate of onset of this slow phase is dependent on both intracellular  $\text{Ca}^{2+}$  and extracellular anions. The non- $I_{\text{inst}}$  components of current onset during depolarization were fit with double exponential time constants ( $\tau_{a1}$ , fast;  $\tau_{a2}$ , slow) for WT channels with 200 and 400 nM internal  $\text{Ca}^{2+}$  and with external  $\text{Cl}^-$  and  $\text{I}^-$ . The amplitude of the slowly deactivating component at –120 mV as a portion of the total initial current at –120 mV ( $\tau_{\text{ONdeact}/s_i}$ ) increased with the same time course as  $\tau_{a2}$  of current activation, which was insensitive to the change in internal  $\text{Ca}^{2+}$  or external anionic species (Figure 6J). Instead, the balance between the instantaneous and slow activation rates were affected by anions and  $\text{Ca}^{2+}$  (Figure 6I), suggesting that conformational changes in the protein, rather than the ion-binding events, are likely rate limiting for full activation of the channel.

We also modeled channel deactivation from +120 mV to –120 mV with double exponentials ( $\tau_{d1}$ , fast;  $\tau_{d2}$ , slow) and compared them to the decay in the amplitude of the instantaneous current of a subsequent pulse to +120 mV following pulses with variable length to –120 mV (Figure 6H, lower panel, arrows; Figure 6K). We found that the time course of the “loss of instantaneous” (“L.O.I.”) current occurred with a  $\tau$  similar to  $\tau_{d2}$ . Slow deactivation ( $\tau_{d2}$ ), unlike for activation, appeared to be slowed by exchange of  $\text{Cl}^-$  for  $\text{I}^-$  (Figure 6K), suggesting hysteresis in the sequence of events leading to activation and anion permeation. We also noticed that the fast  $\tau_{d1}$  varied with both intracellular  $\text{Ca}^{2+}$  and the species of permeant anion; however, the contribution of this  $\tau$  became negligible with longer activating pulses in WT (but not in Q645A with 0  $\text{Ca}^{2+}$  or E650A with 1 mM  $\text{Ca}^{2+}$ , where both  $\tau$  of deactivation and its amplitude were un-

changed by increasing pre-pulse duration), suggesting that it may represent deactivation from a conformation with only a single bound  $\text{Ca}^{2+}$  ion. Altogether, these results are consistent with a model where consecutive conformational changes in TM6 occur: occupancy of the first  $\text{Ca}^{2+}$ -binding site leads to the outwardly rectifying conductance with fast kinetics while occupancy of the second  $\text{Ca}^{2+}$ -binding site leads to the voltage-independent conductance with slow kinetics.

## DISCUSSION

Channel potentiation by  $\text{Cl}^-$  or  $\text{I}^-$  ions represents a positive feedback regulation of channel activity by permeant anions. Anion discrimination is especially relevant to TMEM16A function in the thyroid (Twyffels et al., 2014), where it allows for  $\text{I}^-$  influx in the apex of the thyrocyte. Newly discovered roles for TMEM16A and the closely related TMEM16B in neurons also benefit from the complex gating apparatus of these channels. In thalamocortical neurons, which act as integrators of sensory input and relay information to the cortex, TMEM16B mediates spike frequency adaptation to allow neuronal self-inhibition (Ha et al., 2016), and the multi-phasic  $\text{Ca}^{2+}$ - and voltage-dependent gating is ideally suited to allow it to do so. At low  $[\text{Ca}^{2+}]$ , CaCCs do not conduct outward currents, so they do not contribute to the resting potential in most neurons. As  $[\text{Ca}^{2+}]$  rises in the cell following action potential firing or excitatory synaptic inputs,  $\text{Ca}^{2+}$  binds to its first binding site, “priming” the channel to be activated upon strong depolarization. This priming will not change the action potential threshold of the neuron. With depolarizing spikes, a small population of channels activate quickly to allow an inward flux of  $\text{Cl}^-$  (outward current), and when the spike frequency increases, so does the influx of  $\text{Ca}^{2+}$ , increasing the number of CaCCs able to activate on the timescale of neuronal spiking and providing negative feedback against high-frequency activation of mature central neurons. The identification of TM6 as a voltage- and  $\text{Ca}^{2+}$ -dependent gating element further improves the outlook for designing and understanding the pharmacological profiles of channel modulators. Several TMEM16A inhibitors have been identified, including ostensible pore blockers (Peters et al., 2015), as well as several with still unknown mechanisms of action (Namkung et al., 2011; Oh et al., 2013; Seo et al., 2016). However, binding sites for these drugs have not been mapped. Identifying a transmembrane segment linking permeation and gating would facilitate future development and improvement of compounds to

(H) Deactivation (top) and reactivation (bottom) time courses following activating and deactivating pulses of increasing duration to +120 mV and –120 mV, respectively, for Q645A with 0  $\text{Ca}^{2+}$  (left) and WT with 400 nM internal  $\text{Ca}^{2+}$  (right). For WT, time constants of activation (cyan) and deactivation (orange) are overlaid with the onset of slow deactivation (top) and the decay of instantaneous current amplitude (bottom), respectively.

(I) Normalized amplitudes of the slow component of current deactivation compared to total for WT TMEM16A following 300 ms activating pulses to +120 mV, varying the concentration of intracellular  $\text{Ca}^{2+}$  and the species of extracellular permeant anion, as shown

(J) Slow and fast time constants of current activations for WT TMEM16A under the indicated conditions. Also shown is the time constant of onset of a slow component/total amplitude of deactivation during activations of increasing duration ( $\tau_{\text{ONdeact}/s_i}$ ) as indicated by arrows in (E) (top, right).

(K) Slow and fast time constants of current deactivations for WT TMEM16A under the indicated conditions. Also shown is the time constant of “loss of instantaneous” (L.O.I.) current, representing the recovery of the slowly activating current at +120 mV following deactivations of increasing duration at –120 mV as indicated by arrows in (H) (bottom, right), and the single exponential “fast”  $\tau$  of deactivation for Q645A with 0  $\text{Ca}^{2+}$  and E650A with 1 mM  $\text{Ca}^{2+}$  (see also Figure S7). n for data depicted in (J) and (K) was  $\tau_{\text{ONdeact}/s_i}$ : 7; 200  $\text{Ca}^{2+}$   $\text{Cl}^-$ , 9; 200  $\text{Ca}^{2+}$   $\text{I}^-$ , 9; 400  $\text{Ca}^{2+}$   $\text{Cl}^-$ , 13; 400  $\text{Ca}^{2+}$   $\text{I}^-$ , 8;  $\tau_{\text{OFF}}$  “L.O.I.”: 8; Q645A, 6; E650A, 6.

Red dashed lines in (A), (B), (D), and (F) indicate 0 nA. All pooled data are expressed as mean  $\pm$  SEM.

See also Figure S7.

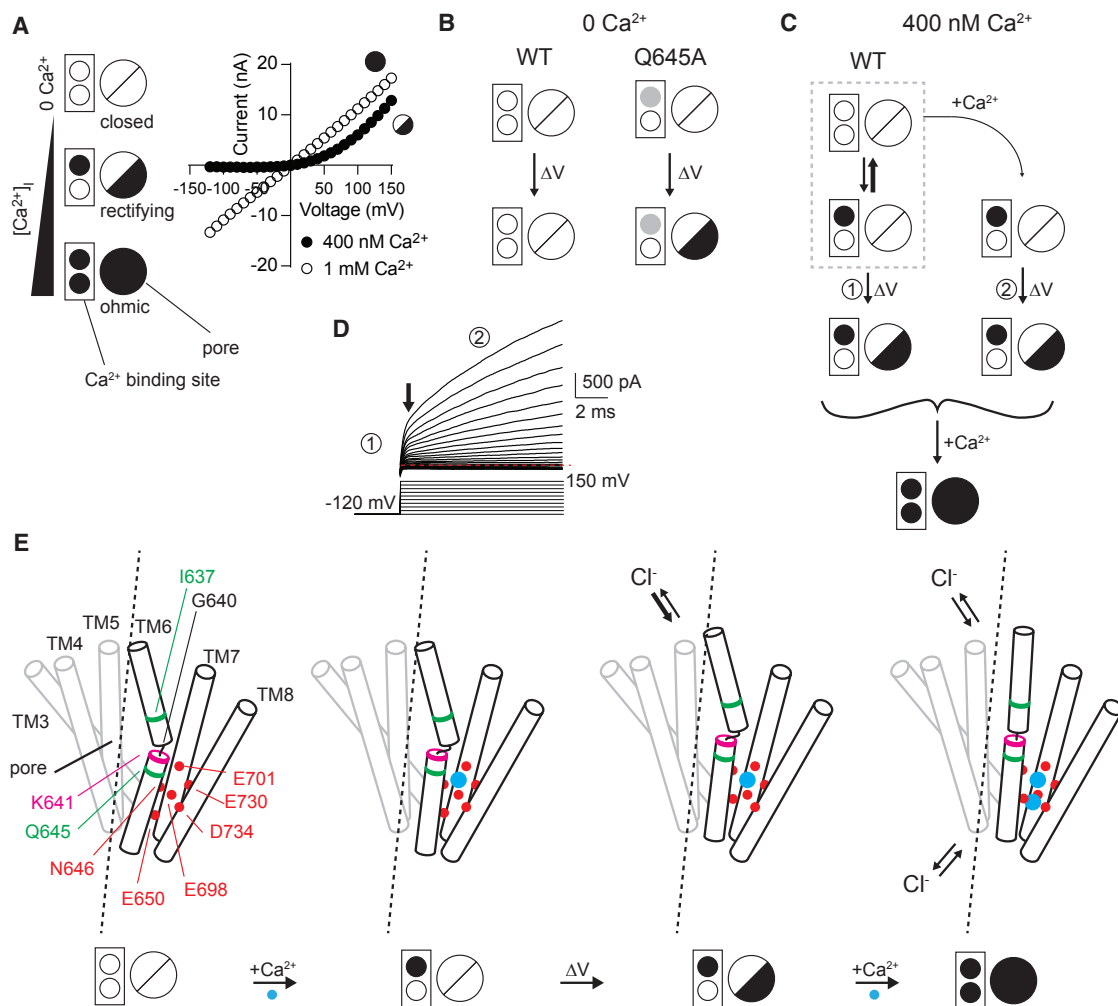

**Figure 7. A Dynamic Interplay of  $\text{Ca}^{2+}$  and Voltage Controls TMEM16A Gating**

(A) Left: a simplified model depicting changes to TMEM16A. Two circles within the box represent the two  $\text{Ca}^{2+}$ -binding sites, with filled circles indicating occupancy by  $\text{Ca}^{2+}$ . The larger circle represents the pore, with a line indicating a closed pore, half-filled circle for the outward-rectifying open state and fully filled circle for the Ohmic open state. Right: a sample steady-state I-V distinguishing the two open states for channels with single or double  $\text{Ca}^{2+}$  occupancy.

(B) A basic gating scheme for the WT and Q645A mutant TMEM16A under conditions of 0  $\text{Ca}^{2+}$ . Left: the WT channel does not activate in response to voltage changes (up to +200 mV) without  $\text{Ca}^{2+}$  while the Q645A mutant (right) activates in response to membrane-voltage potential changes as though with single  $\text{Ca}^{2+}$  occupancy, indicated by a gray filled circle.

(C) The WT channel, under conditions of moderate  $\text{Ca}^{2+}$  concentration, exists in equilibrium (gray dotted box) with the majority of channels not bound to  $\text{Ca}^{2+}$  and a small number bound to a single  $\text{Ca}^{2+}$ . After depolarization, the few channels with single  $\text{Ca}^{2+}$  occupancy open quickly and allow anion flux. As time passes, an increasing number of channels enter the single- $\text{Ca}^{2+}$ -bound state whereupon they can be opened by depolarization, which also favors the binding of the second  $\text{Ca}^{2+}$  ion, stabilizing the channel and leading to slowly activating current upon depolarization. With elevated  $\text{Ca}^{2+}$  levels, the channel can readily bind two  $\text{Ca}^{2+}$  ions and enter a non-rectifying Ohmic open state.

(D) A sample trace illustrates different phases of TMEM16A conductance after depolarization under moderate  $\text{Ca}^{2+}$  levels. A small, rapid, outward current (1) results from opening of channels with single  $\text{Ca}^{2+}$  occupancy while the slower increase (2) reflects the need for channels to first bind  $\text{Ca}^{2+}$  before entering an open state.

(E) A model of TM6 gating in response to  $\text{Ca}^{2+}$  and voltage changes. Green residues are those in TM6 critical for the  $\text{Ca}^{2+}$  requirement for activation, while magenta indicates K641. Red circles and red residues indicate the  $\text{Ca}^{2+}$ -binding residues of TM6, -7, and -8. Blue circles are  $\text{Ca}^{2+}$  ions.

influence TMEM16A activity for both *in vitro* studies and *in vivo* applications.

Based on results from several approaches presented in this study, we propose a model for how the molecular machinery involved produces synergistic channel gating interactions between internal  $\text{Ca}^{2+}$ , external anions, and intrinsic components

of the channel (Figure 7). In the absence of internal  $\text{Ca}^{2+}$ , the WT channel is closed but can bind  $\text{Ca}^{2+}$  ions. As  $[\text{Ca}^{2+}]$  increases, association of one  $\text{Ca}^{2+}$  ion allows anions to enter the outer pore and “primes” the channel to undergo a fast voltage-dependent conformational change involving TM6 to mediate anion conductance upon depolarization. Replacement



of external  $\text{Cl}^-$  with  $\text{I}^-$  likely increases the dwell time and/or interaction of the anion in the outer pore to stabilize this conformation of TM6, thus favoring the subsequent voltage-dependent conformational changes at less depolarizing voltages. Depolarization allows the channel to enter its first open state with fast kinetics, and this state favors the binding of a second  $\text{Ca}^{2+}$  ion. Association of a second  $\text{Ca}^{2+}$  ion results in the stabilization of the fully activated conformation of TM6, resulting in much slower deactivation kinetics and ostensibly Ohmic anion conductance. When I637 or Q645 was replaced with alanine, the conformational change normally associated with the first  $\text{Ca}^{2+}$ -binding event could take place in the absence of divalent cations, allowing the channel to be opened to its first conductive conformation by depolarization alone (see [Figures 3E–3G](#) and [7B](#)); however, these two mutations produce non-equivalent effects on gating and likely point to the existence of separable, sequential conformational changes in TM6 ([Figure 7E](#)), which are also strongly dependent on the properties of several other amino acids on TM6. Without  $\text{Ca}^{2+}$  binding, channels cannot enter the second open state, which requires bound  $\text{Ca}^{2+}$  to be stable, thus explaining the absence of the slower activating current and failure of these mutant channels to adopt an Ohmic conductance.

The idea that TM6 is a dynamic segment sensitive to external stimuli is consistent with previous results examining this region of the protein. TM6 had been predicted to form an external reentrant loop based on topology prediction algorithms ([Yang et al., 2008](#)), before studies using cysteine accessibility and cross-linking analysis refined the topology to show that TM6 indeed traversed the membrane ([Yu et al., 2012](#); [Tien et al., 2014](#)). While the key residues highlighted in this study are well conserved with the closely related TMEM16B-CaCC, the conservation is poor for family members that are not  $\text{Cl}^-$  channels ([Figure 2A](#)). However, the  $\text{Ca}^{2+}$ -binding residues in TM6–TM8 are highly conserved, and our MD simulations of nhTMEM16 and the TMEM16A structures ([Paulino et al., 2017](#); [Dang et al., 2017](#)) demonstrate a high likelihood that this portion of the structure adopts several stable conformations involving different packing of TM6 with the surrounding helices. Thus, the role of TM6 in transducing  $\text{Ca}^{2+}$  binding into protein conformational change is likely conserved. G640, a proposed hinge examined in this study, influences the interaction between  $\text{Ca}^{2+}$  binding and conformational changes in TM6 associated with voltage-dependent channel gating.

While we could identify an innate voltage dependence to the channel by using site-directed mutagenesis to eliminate the requirement of  $\text{Ca}^{2+}$  for activation, the underlying source of the voltage dependence is unclear. The slope of voltage dependence was shallow: for example, the G-V slope ( $k$  in [Equation 3](#) in [STAR Methods](#)) of Q645A was  $39 \pm 4$  mV, corresponding to an apparent transferred gating charge of  $0.65 \pm 0.06 q_e$  per subunit—much smaller than the 3–4  $q_e$  per subunit for voltage-gated ion channels ([Zagotta et al., 1994](#)). The charge may be carried by TM6 itself—K641, when mutated to alanine, did shift the “Boltzmann” component of gating both with and without internal  $\text{Ca}^{2+}$ —however, the mutant channel did retain underlying sensitivity to voltage, suggesting that other residues contribute to the gating charge. Of the side chains predicted to coordinate  $\text{Ca}^{2+}$ , five are acidic and may also be sensitive to

voltage ([Yu et al., 2012](#); [Tien et al., 2014](#); [Paulino et al., 2017](#); [Dang et al., 2017](#)). Moreover, five of the six  $\text{Ca}^{2+}$  coordinating side chains caused shifts in voltage sensitivity when mutated in the Q645A background. However, as with K641 mutants, removal of one of these negative charges shifted, but did not abolish, voltage dependence. Furthermore, the persistent ability of the more permeant  $\text{I}^-$  to modify voltage dependence suggests that anion presence in the permeation pathway may have a significant role in the conformational changes associated with gating.

In summary, we have determined that the sixth transmembrane segment, which harbors both pore-lining residues and  $\text{Ca}^{2+}$ -binding sites ([Dang et al., 2017](#)), represents a critical component of the TMEM16A-gating mechanism. As other regions of the protein have also been implicated in regulating channel gating, including the N terminus, the C terminus, and several of the intracellular loops ([Ferrera et al., 2009, 2011](#); [Xiao et al., 2011](#)), future studies will be necessary to elucidate how these regions may interact either directly or allosterically with the machinery described here. Since some members of the TMEM16 family show vastly different channel function and/or scramblase behavior dependent on structural motifs in the same region of the protein ([Yang et al., 2012](#); [Yu et al., 2015](#); [Bethel and Grabe, 2016](#)), testing for homologous regions in those proteins may help in developing a theory to explain the functional disparities between family members and to identify commonality in regulatory mechanisms.

## STAR★METHODS

Detailed methods are provided in the online version of this paper and include the following:

- [KEY RESOURCES TABLE](#)
- [CONTACT FOR REAGENT AND RESOURCE SHARING](#)
- [EXPERIMENTAL MODEL AND SUBJECT DETAILS](#)
  - Cell Lines
- [METHOD DETAILS](#)
  - Molecular Dynamics
  - Generation of cDNA Reagents
  - Transfection
  - Immunocytochemistry
  - Patch Clamp Electrophysiology
- [QUANTIFICATION AND STATISTICAL ANALYSIS](#)
  - Patch Clamp Electrophysiology
  - Immunocytochemistry

## SUPPLEMENTAL INFORMATION

Supplemental Information includes seven figures and can be found with this article online at <https://doi.org/10.1016/j.neuron.2018.01.048>.

## ACKNOWLEDGMENTS

We would like to thank Huanghe Yang, Zhiqiang Yan, and Wei Zhang for helpful comments on the manuscript. C.J.P. is supported by NIH grant K99DA041500. N.P.B and M.G. are supported by NIH grants R01GM117593, R01GM089740, and T32EB009389. L.Y.J. is supported by NIH grant R01NS069229. Simulations were carried out with the support of grant MCB-80011 from the Extreme

Science and Engineering Discovery Environment. Y.N.J. and L.Y.J. are Howard Hughes Medical Institute investigators.

#### AUTHOR CONTRIBUTIONS

Conceptualization, C.J.P., J.T., and L.Y.J.; Methodology, C.J.P., N.P.B., and M.G.; Investigation, C.J.P., J.M.G., J.T., L.Q., N.P.B., T.C., and L.W.; Formal Analysis, C.J.P., J.M.G., L.Q., and N.P.B.; Writing—Original Draft, C.J.P. and L.Y.J.; Writing—Review & Editing, C.J.P., J.M.G., Y.N.J., and L.Y.J.; Visualization, C.J.P., J.M.G., and N.P.B.; Funding Acquisition, L.Y.J.; Resources, Y.N.J., M.G., and L.Y.J.; Supervision, M.G. and L.Y.J.

#### DECLARATION OF INTERESTS

The authors report no competing interests.

Received: July 15, 2017

Revised: December 3, 2017

Accepted: January 26, 2018

Published: February 22, 2018

#### REFERENCES

- Ardeleanu, C., Arsene, D., Hinescu, M., Andrei, F., Gutu, D., Luca, L., and Popescu, L.M. (2009). Pancreatic expression of DOG1: a novel gastrointestinal stromal tumor (GIST) biomarker. *Appl. Immunohistochem. Mol. Morphol.* *17*, 413–418.
- Bethel, N.P., and Grabe, M. (2016). Atomistic insight into lipid translocation by a TMEM16 scramblase. *Proc. Natl. Acad. Sci. USA* *113*, 14049–14054.
- Brunner, J.D., Lim, N.K., Schenck, S., Duerst, A., and Dutzler, R. (2014). X-ray structure of a calcium-activated TMEM16 lipid scramblase. *Nature* *516*, 207–212.
- Caputo, A., Caci, E., Ferrera, L., Pedemonte, N., Barsanti, C., Sondo, E., Pfeffer, U., Ravazzolo, R., Zegarra-Moran, O., and Galletta, L.J. (2008). TMEM16A, a membrane protein associated with calcium-dependent chloride channel activity. *Science* *322*, 590–594.
- Case, D.A., Cheatham, T.E., 3rd, Darden, T., Gohlke, H., Luo, R., Merz, K.M., Jr., Onufriev, A., Simmerling, C., Wang, B., and Woods, R.J. (2005). The Amber biomolecular simulation programs. *J. Comput. Chem.* *26*, 1668–1688.
- Cho, H., Yang, Y.D., Lee, J., Lee, B., Kim, T., Jang, Y., Back, S.K., Na, H.S., Harfe, B.D., Wang, F., et al. (2012). The calcium-activated chloride channel anoctamin 1 acts as a heat sensor in nociceptive neurons. *Nat. Neurosci.* *15*, 1015–1021.
- Contreras-Víte, J.A., Cruz-Rangel, S., De Jesús-Pérez, J.J., Figueroa, I.A., Rodríguez-Menchaca, A.A., Pérez-Cornejo, P., Hartzell, H.C., and Arreola, J. (2016). Revealing the activation pathway for TMEM16A chloride channels from macroscopic currents and kinetic models. *Pflugers Arch.* *468*, 1241–1257.
- Cruz-Rangel, S., De Jesús-Pérez, J.J., Aréchiga-Figueroa, I.A., Rodríguez-Menchaca, A.A., Pérez-Cornejo, P., Hartzell, H.C., and Arreola, J. (2017). Extracellular protons enable activation of the calcium-dependent chloride channel TMEM16A. *J. Physiol.* *595*, 1515–1531.
- Dang, S., Feng, S., Tien, J., Peters, C.J., Bulkley, D., Lolicato, M., Zhao, J., Qi, L., Chen, T., Jan, Y.N., et al. (2017). Cryo-EM structures of the TMEM16A calcium-activated chloride channel. *Nature* *552*, 426–429.
- Davis, A.J., Forrest, A.S., Jepps, T.A., Valencik, M.L., Wiwchar, M., Singer, C.A., Sones, W.R., Greenwood, I.A., and Leblanc, N. (2010). Expression profile and protein translation of TMEM16A in murine smooth muscle. *Am. J. Physiol. Cell Physiol.* *299*, C948–C959.
- Ding, S., Ingleby, L., Ahern, C.A., and Horn, R. (2005). Investigating the putative glycine hinge in Shaker potassium channel. *J. Gen. Physiol.* *126*, 213–226.
- Duvvuri, U., Shiwarski, D.J., Xiao, D., Bertrand, C., Huang, X., Edinger, R.S., Rock, J.R., Harfe, B.D., Henson, B.J., Kunzelmann, K., et al. (2012). TMEM16A induces MAPK and contributes directly to tumorigenesis and cancer progression. *Cancer Res.* *72*, 3270–3281.
- Ferrera, L., Caputo, A., Ubby, I., Bussani, E., Zegarra-Moran, O., Ravazzolo, R., Pagani, F., and Galletta, L.J. (2009). Regulation of TMEM16A chloride channel properties by alternative splicing. *J. Biol. Chem.* *284*, 33360–33368.
- Ferrera, L., Scudieri, P., Sondo, E., Caputo, A., Caci, E., Zegarra-Moran, O., Ravazzolo, R., and Galletta, L.J. (2011). A minimal isoform of the TMEM16A protein associated with chloride channel activity. *Biochim. Biophys. Acta* *1808*, 2214–2223.
- Ha, G.E., Lee, J., Kwak, H., Song, K., Kwon, J., Jung, S.Y., Hong, J., Chang, G.E., Hwang, E.M., Shin, H.S., et al. (2016). The Ca<sup>2+</sup>-activated chloride channel anoctamin-2 mediates spike-frequency adaptation and regulates sensory transmission in thalamocortical neurons. *Nat. Commun.* *7*, 13791.
- Heinemann, S.H., and Conti, F. (1992). Nonstationary noise analysis and application to patch clamp recordings. *Methods Enzymol.* *207*, 131–148.
- Huang, F., Rock, J.R., Harfe, B.D., Cheng, T., Huang, X., Jan, Y.N., and Jan, L.Y. (2009). Studies on expression and function of the TMEM16A calcium-activated chloride channel. *Proc. Natl. Acad. Sci. USA* *106*, 21413–21418.
- Huang, F., Zhang, H., Wu, M., Yang, H., Kudo, M., Peters, C.J., Woodruff, P.G., Solberg, O.D., Donne, M.L., Huang, X., et al. (2012). Calcium-activated chloride channel TMEM16A modulates mucin secretion and airway smooth muscle contraction. *Proc. Natl. Acad. Sci. USA* *109*, 16354–16359.
- Jeng, G., Aggarwal, M., Yu, W.P., and Chen, T.Y. (2016). Independent activation of distinct pores in dimeric TMEM16A channels. *J. Gen. Physiol.* *148*, 393–404.
- Jiang, Y., Lee, A., Chen, J., Cadene, M., Chait, B.T., and MacKinnon, R. (2002). The open pore conformation of potassium channels. *Nature* *417*, 523–526.
- Klauda, J.B., Venable, R.M., Freites, J.A., O'Connor, J.W., Tobias, D.J., Mondragon-Ramirez, C., Vorobyov, I., MacKerell, A.D., Jr., and Pastor, R.W. (2010). Update of the CHARMM all-atom additive force field for lipids: validation on six lipid types. *J. Phys. Chem. B* *114*, 7830–7843.
- Lee, J., Cheng, X., Swails, J.M., Yeom, M.S., Eastman, P.K., Lemkul, J.A., Wei, S., Buckner, J., Jeong, J.C., Qi, Y., et al. (2016). CHARMM-GUI input generator for NAMD, GROMACS, AMBER, OpenMM, and CHARMM/OpenMM simulations using the CHARMM36 additive force field. *J. Chem. Theory Comput.* *12*, 405–413.
- Lim, N.K., Lam, A.K., and Dutzler, R. (2016). Independent activation of ion conduction pores in the double-barreled calcium-activated chloride channel TMEM16A. *J. Gen. Physiol.* *148*, 375–392.
- Manoury, B., Tamuleviciute, A., and Tammara, P. (2010). TMEM16A/anoctamin 1 protein mediates calcium-activated chloride currents in pulmonary arterial smooth muscle cells. *J. Physiol.* *588*, 2305–2314.
- Namkung, W., Phuan, P.W., and Verkman, A.S. (2011). TMEM16A inhibitors reveal TMEM16A as a minor component of calcium-activated chloride channel conductance in airway and intestinal epithelial cells. *J. Biol. Chem.* *286*, 2365–2374.
- Ni, Y.L., Kuan, A.S., and Chen, T.Y. (2014). Activation and inhibition of TMEM16A calcium-activated chloride channels. *PLoS ONE* *9*, e87634.
- Oh, S.J., Hwang, S.J., Jung, J., Yu, K., Kim, J., Choi, J.Y., Hartzell, H.C., Roh, E.J., and Lee, C.J. (2013). MONNA, a potent and selective blocker for transmembrane protein with unknown function 16/anoctamin-1. *Mol. Pharmacol.* *84*, 726–735.
- Paulino, C., Kalienkova, V., Lam, A.K.M., Neldner, Y., and Dutzler, R. (2017). Activation mechanism of the calcium-activated chloride channel TMEM16A revealed by cryo-EM. *Nature* *552*, 421–425.
- Perez-Cornejo, P., De Santiago, J.A., and Arreola, J. (2004). Permeant anions control gating of calcium-dependent chloride channels. *J. Membr. Biol.* *198*, 125–133.
- Peters, C.J., Yu, H., Tien, J., Jan, Y.N., Li, M., and Jan, L.Y. (2015). Four basic residues critical for the ion selectivity and pore blocker sensitivity of TMEM16A calcium-activated chloride channels. *Proc. Natl. Acad. Sci. USA* *112*, 3547–3552.
- Sali, A., and Blundell, T.L. (1993). Comparative protein modelling by satisfaction of spatial restraints. *J. Mol. Biol.* *234*, 779–815.

- Schroeder, B.C., Cheng, T., Jan, Y.N., and Jan, L.Y. (2008). Expression cloning of TMEM16A as a calcium-activated chloride channel subunit. *Cell* *134*, 1019–1029.
- Seo, Y., Lee, H.K., Park, J., Jeon, D.K., Jo, S., Jo, M., and Namkung, W. (2016). Ani9, a novel potent small-molecule ANO1 inhibitor with negligible effect on ANO2. *PLoS ONE* *11*, e0155771.
- Ta, C.M., Adomaviciene, A., Rorsman, N.J., Garnett, H., and Tammaro, P. (2016). Mechanism of allosteric activation of TMEM16A/ANO1 channels by a commonly used chloride channel blocker. *Br. J. Pharmacol.* *173*, 511–528.
- Tien, J., Lee, H.Y., Minor, D.L., Jr., Jan, Y.N., and Jan, L.Y. (2013). Identification of a dimerization domain in the TMEM16A calcium-activated chloride channel (CaCC). *Proc. Natl. Acad. Sci. USA* *110*, 6352–6357.
- Tien, J., Peters, C.J., Wong, X.M., Cheng, T., Jan, Y.N., Jan, L.Y., and Yang, H. (2014). A comprehensive search for calcium binding sites critical for TMEM16A calcium-activated chloride channel activity. *eLife* *3*, e02772.
- Twyffels, L., Strickaert, A., Virreira, M., Massart, C., Van Sande, J., Wauquier, C., Beauwens, R., Dumont, J.E., Galiotta, L.J., Boom, A., and Kruys, V. (2014). Anoctamin-1/TMEM16A is the major apical iodide channel of the thyrocyte. *Am. J. Physiol. Cell Physiol.* *307*, C1102–C1112.
- Xiao, Q., Yu, K., Perez-Cornejo, P., Cui, Y., Arreola, J., and Hartzell, H.C. (2011). Voltage- and calcium-dependent gating of TMEM16A/Ano1 chloride channels are physically coupled by the first intracellular loop. *Proc. Natl. Acad. Sci. USA* *108*, 8891–8896.
- Yang, Y.D., Cho, H., Koo, J.Y., Tak, M.H., Cho, Y., Shim, W.S., Park, S.P., Lee, J., Lee, B., Kim, B.M., et al. (2008). TMEM16A confers receptor-activated calcium-dependent chloride conductance. *Nature* *455*, 1210–1215.
- Yang, H., Kim, A., David, T., Palmer, D., Jin, T., Tien, J., Huang, F., Cheng, T., Coughlin, S.R., Jan, Y.N., and Jan, L.Y. (2012). TMEM16F forms a Ca<sup>2+</sup>-activated cation channel required for lipid scrambling in platelets during blood coagulation. *Cell* *151*, 111–122.
- Yu, K., Duran, C., Qu, Z., Cui, Y.Y., and Hartzell, H.C. (2012). Explaining calcium-dependent gating of anoctamin-1 chloride channels requires a revised topology. *Circ. Res.* *110*, 990–999.
- Yu, K., Whitlock, J.M., Lee, K., Ortlund, E.A., Cui, Y.Y., and Hartzell, H.C. (2015). Identification of a lipid scrambling domain in ANO6/TMEM16F. *eLife* *4*, e06901.
- Zagotta, W.N., Hoshi, T., Dittman, J., and Aldrich, R.W. (1994). Shaker potassium channel gating. II: Transitions in the activation pathway. *J. Gen. Physiol.* *103*, 279–319.

## STAR★METHODS

### KEY RESOURCES TABLE

| REAGENT or RESOURCE                                                         | SOURCE                                                  | IDENTIFIER                                                                                                              |
|-----------------------------------------------------------------------------|---------------------------------------------------------|-------------------------------------------------------------------------------------------------------------------------|
| <b>Antibodies</b>                                                           |                                                         |                                                                                                                         |
| Rhodamine-Wheat germ agglutinin                                             | Vector Laboratories                                     | Z0109                                                                                                                   |
| <b>Bacterial and Virus Strains</b>                                          |                                                         |                                                                                                                         |
| <i>Escherichia coli</i> : DH5 $\alpha$ strain, subcloning efficiency        | Original: Invitrogen, maintained in house               | Cat#18265017                                                                                                            |
| <b>Chemicals, Peptides, and Recombinant Proteins</b>                        |                                                         |                                                                                                                         |
| Salts, acids, bases, chelators for recording solutions                      | Sigma-Aldrich                                           | stock                                                                                                                   |
| D-Mannitol                                                                  | Sigma-Aldrich                                           | stock                                                                                                                   |
| Fluo 8-Potassium salt                                                       | AAT-Bioquest                                            | Cat#20189                                                                                                               |
| Fluo 8FF-Potassium salt                                                     | AAT-Bioquest                                            | Cat#21102                                                                                                               |
| <b>Critical Commercial Assays</b>                                           |                                                         |                                                                                                                         |
| Ca <sup>2+</sup> Calibration Buffer Kit #2                                  | Molecular Probes                                        | Cat#3009                                                                                                                |
| <b>Experimental Models: Cell Lines</b>                                      |                                                         |                                                                                                                         |
| Human: HEK293 cells                                                         | ATCC                                                    | RRID: CVCL_0045                                                                                                         |
| <b>Oligonucleotides</b>                                                     |                                                         |                                                                                                                         |
| Mutagenic primers for PCR                                                   | IDT-DNA Technologies                                    | Custom-made, described in <a href="#">STAR Methods</a>                                                                  |
| <b>Recombinant DNA</b>                                                      |                                                         |                                                                                                                         |
| pEGFP-N1-TMEM16A from <i>Mus musculus</i> (previously generated in our lab) | <a href="#">Tien et al., 2013</a>                       | N/A                                                                                                                     |
| pEGFP-N1-TMEM16B from <i>Mus musculus</i> (previously generated in our lab) | <a href="#">Tien et al., 2013</a>                       | N/A                                                                                                                     |
| <b>Software and Algorithms</b>                                              |                                                         |                                                                                                                         |
| WEBMAXC-chelation prediction software                                       | Chris Patton, Stanford                                  | <a href="http://maxchelator.stanford.edu/webmaxc/webmaxcE.htm">http://maxchelator.stanford.edu/webmaxc/webmaxcE.htm</a> |
| Clustal Omega sequence alignment software                                   | European Bioinformatics Institute                       | <a href="https://www.ebi.ac.uk/Tools/msa/clustalo/">https://www.ebi.ac.uk/Tools/msa/clustalo/</a>                       |
| Boxshade multiple alignment software                                        | K. Hofmann and M. Baron                                 | <a href="https://www.ch.embnet.org/software/BOX_form.html">https://www.ch.embnet.org/software/BOX_form.html</a>         |
| The PyMOL Molecular Graphics System, v.2.0                                  | Schrödinger                                             | <a href="https://pymol.org/2/">https://pymol.org/2/</a>                                                                 |
| PClamp10 software suite                                                     | Molecular Devices                                       | N/A                                                                                                                     |
| GraphPad PRISM 6                                                            | GraphPad Software                                       | N/A                                                                                                                     |
| AutoQuantX3                                                                 | Bitplane                                                | N/A                                                                                                                     |
| ImarisColoc                                                                 | Bitplane                                                | N/A                                                                                                                     |
| Amber 14                                                                    | <a href="#">Case et al., 2005</a>                       | <a href="http://ambermd.org/">http://ambermd.org/</a>                                                                   |
| MODELER 9.15                                                                | <a href="#">Sali and Blundell, 1993</a>                 | <a href="https://salilab.org/modeller/9.15/release.html">https://salilab.org/modeller/9.15/release.html</a>             |
| CHARMM-GUI                                                                  | <a href="#">Lee et al., 2016</a>                        | <a href="http://www.charmm-gui.org/">http://www.charmm-gui.org/</a>                                                     |
| matplotlib                                                                  | J. Hunter                                               | <a href="https://matplotlib.org/">https://matplotlib.org/</a>                                                           |
| Visual molecular dynamics                                                   | NIH Center for Macromolecular Modeling & Bioinformatics | <a href="http://www.ks.uiuc.edu/Research/vmd/">http://www.ks.uiuc.edu/Research/vmd/</a>                                 |
| <b>Other</b>                                                                |                                                         |                                                                                                                         |
| Borosilicate thick wall glass 1.5 OD/0.86 ID                                | Sutter Instrument                                       | BF150-86-10                                                                                                             |
| Borosilicate theta glass 1.5 OD                                             | Sutter Instrument                                       | BT-150-10                                                                                                               |

### CONTACT FOR REAGENT AND RESOURCE SHARING

Further information and requests for resources and reagents should be directed to and will be fulfilled by the Lead Contact, Lily Jan ([lily.jan@ucsf.edu](mailto:lily.jan@ucsf.edu)).

## EXPERIMENTAL MODEL AND SUBJECT DETAILS

### Cell Lines

HEK293 cells (ATCC, RRID: CVCL\_0045) were maintained at 37°C and 5% CO<sub>2</sub> in Dulbecco's Modified Eagle's Medium supplemented with 10% Fetal Bovine Serum and 1% penicillin/streptomycin, and were passaged upon reaching confluency (every 2-4 days) using 0.05% Trypsin-EDTA. These are a commercially available cell line and are authenticated by the manufacturer. Sex: female.

## METHOD DETAILS

### Molecular Dynamics

Molecular dynamics simulations of nhTMEM16 were performed to predict regions of structural mobility in the protein. Modeler 9.15 (Sali and Blundell, 1993) was used to build in loops missing from the crystal structure (PDB: 4WIS). Using CHARMM-GUI (Lee et al., 2016), nhTMEM16 was embedded in a POPC bilayer. The entire system consisted of 356,426 atoms with 710 lipids. Simulations were run at constant pressure (1 bar) and temperature (303.15 K) using the CHARMM36 forcefield (Klauda et al., 2010). Using the CUDA enabled version of Amber (Case et al., 2005), eight parallel simulations were run for 400 ns each, yielding an aggregate simulation time of 3.2  $\mu$ s.

### Generation of cDNA Reagents

TMEM16A (splice variant 'a') and TMEM16B clones from *Mus musculus* (NCBI: NP\_001229278.1, NP\_705817.2) in a pEGFP-N1 expression vector were used for all experiments. Single point mutations were introduced using Phusion polymerase for PCR, as instructed by the manufacturer, and mutagenic oligonucleotides were purchased from IDT-DNA Technologies (Iowa). Mutagenic primers consisted of reverse complimentary 33-mers centered upon the codon representing the targeted amino acid, whereupon nonsynonymous base pairs were introduced to the sequence by PCR. Mutant clones were confirmed by Sanger sequencing at Quintara Biosciences (South San Francisco, CA).

### Transfection

24 hr before recording, cells were transiently transfected with TMEM16A constructs using Lipofectamine 2000 (Invitrogen), in antibiotic free media, as recommended by the manufacturer. On the morning before recording, cells were re-plated onto poly-L-lysine coated coverslips by dispersion with 0.05% trypsin followed by neutralization and dilution with bath medium. Cells were allowed to settle for at least 1 hr prior to recording.

### Immunocytochemistry

To examine surface expression of TMEM16A-GFP mutants, transfected HEK293 cells were immunostained using a cell-surface marker and overlap of this marker with GFP. After a 24 hr transfection period, cells were fixed in 2% paraformaldehyde for 10 min on ice. Cells were washed two times in 1X Phosphate Buffered Saline (PBS), 10 min each. Cells were incubated in blocking solution with 1% heat inactivated goat serum and 1:150 wheat germ agglutinin (Vector Labs, Burlingame CA) for 1 hr at room temperature. Cells were then washed in 1X PBS three times, 10 min each. The coverslips with the cells were then mounted onto Fisher premium frosted microscope slides with DAPI Fluoromount-G (SouthernBiotech). Cells were visualized using a Leica SP8 confocal microscope at 63X. 30  $\mu$ m thick Z stacks were acquired.

## Patch Clamp Electrophysiology

### Patch Pipettes

All electrophysiology experiments were performed using borosilicate glass purchased from Sutter Instrument Company (Novato, CA). Patch pipettes were pulled from 1.5/0.86 (OD/ID) glass and polished to 2-2.5 M $\Omega$  resistance (inside-out patch) or 3-5 M $\Omega$  (whole cell patch). Rapid solution exchange pipettes were pulled from Theta glass (Sutter) and manually broken to approximately 50  $\mu$ m in diameter by scoring with a ceramic tile.

### Solutions

For patch clamp electrophysiology, coverslips were transferred into a recording bath solution containing 140 mM NaCl, 10 mM HEPES and 5 mM EGTA, pH7.2/NMDG. All recordings were made at room temperature. Internal solutions containing buffered Ca<sup>2+</sup> were made at pH 7.2 by combining Ca(OH)<sub>2</sub> and EGTA to a ratio predicted by CaBuf software (KU Leuven) and then adding 140 mM NaCl or NMDG-Cl and 10 mM HEPES to the desired volume. Ca<sup>2+</sup> concentrations were subsequently measured directly against calcium standards using a commercial Ca<sup>2+</sup> buffer kit (Invitrogen) in a Fluo-8 or Fluo-8FF fluorescent assay in a BioTek Synergy H4 plate reader. Solutions containing free Ca<sup>2+</sup> greater than 100  $\mu$ M were made by adding CaCl directly to an EGTA-free version of our 140 mM NaCl solution, to the desired concentration. Solutions for biionic experiments were made by substituting the desired anions or cations for Na<sup>+</sup> or Cl<sup>-</sup> in equimolar concentrations. Solution osmolality was adjusted to 305  $\pm$  5 mOsm by addition of D-mannitol. All laboratory chemicals were purchased from Sigma-Aldrich, unless otherwise noted.



### Data Collection and Equipment

Perfusion exchange was performed using a VM-8 perfusion apparatus with Octaflow software (ALA Scientific). Recordings were made using an Axon Instruments Multiclamp 700 with Digidata 1440, and were collected into pClamp10 software. All patch clamp seals were allowed to reach at least 3 GΩ resistance before patch rupture, but typical seal resistance usually exceeded 10 GΩ. All recordings were made using a 1M KCl agar bridge to prevent baseline fluctuation at the reference electrode.

Rapid solution exchange experiments used an Automate piezo driven exchanger with Theta-glass pipette applicators pulled from 1.5 mm OD Theta glass (Sutter Instrument). Data were collected at 10 kHz sampling rate and low pass filtered online at 2 kHz (bi-ionic recordings), or at 100 kHz and filtered at 10 kHz, then reduced by a factor of 3, resulting in digitization at 33.3 kHz for non-stationary analysis recordings.

## QUANTIFICATION AND STATISTICAL ANALYSIS

### Patch Clamp Electrophysiology

#### Data Analysis

All offline data analysis was performed using Graphpad Prism 6, Clampfit 10 and Microsoft Excel. Concentration-dependence curves for Ca<sup>2+</sup> or permeant anions (X<sup>-</sup>) were generated by fitting data to an equation of the form:

$$\frac{I}{I_{MAX}} = \frac{1}{1 + \left(\frac{K_D}{[ion]}\right)^{n_H}} \quad \text{Equation 1}$$

where I/IMAX denotes current normalized to the maximum amplitude in the highest [Ca<sup>2+</sup>] or [X<sup>-</sup>] tested, KD denotes the dissociation constant for that ion and nH denotes the Hill coefficient.

Voltage-dependence of EC<sub>50</sub> values for gating by extracellular anions were calculated by fitting data to an equation of the form:

$$\text{LOG}(EC_{50}) = \text{LOG}(EC_{50})_{0\text{ mV}} - \frac{z\delta FV}{RT} \quad \text{Equation 2}$$

Normalized conductances were parsed by dividing the resulting zδ values from the overall G-V relationship to reveal Boltzmann shaped residual curves, which were fit to voltage-dependent gating data using an equation of the form:

$$G(V) = \frac{1}{1 + e^{\left(\frac{V_{1/2} - V}{k}\right)}} \quad \text{Equation 3}$$

where V<sub>1/2</sub> represents the voltage where half of the channels are active, and k represents a slope factor for the sigmoidal curve.

To quantify the time courses of channel activation and deactivation, voltage clamp traces were fit with single or double exponential curves with equations of forms, respectively:

$$I_t = I_0 - A(1 - e^{-t/\tau}) \text{ or } I_t = I_0 - [A_1(1 - e^{-t/\tau_1}) + A_2(1 - e^{-t/\tau_2})] \quad \text{Equation 4.1, 4.2}$$

Single channel conductance was estimated using non-stationary fluctuation analysis of current traces by plotting signal variance against amplitude and fitting a polynomial function:

$$\sigma^2 = iI - \frac{I^2}{n} \quad \text{Equation 5}$$

where σ<sup>2</sup> denotes signal variance, I denotes macroscopic current, i denotes single-channel current and n the number of channels in the patch. Single channel conductance (γ) was calculated by dividing i by (Vm-ERev) for Cl<sup>-</sup> ions. Outlying values for signal variance (ie: system noise versus channel noise) were identified and eliminated by iteratively calculating standard deviation across samples at each time point and eliminating values larger than 4 SD from the mean after each calculation until an unchanging value for variance was reached, as has been described (Heinemann and Conti, 1992). Permeability ratios were determined from biionic conditions using a reduced form of the Goldman-Hodgkin-Katz voltage equation:

$$E_{REV} = \frac{RT}{zF} \text{Ln} \frac{P_X[X^-]_O}{P_{Cl}[Cl^-]_I} \quad \text{Equation 6}$$

where z represents the valence of the anion, PX represents relative permeability of ion species "X" and F, R and T have their usual thermodynamic meanings.

Sequence alignments were performed using Clustal Omega and visually rendered in BoxShade via the ExPasy web portal.

#### Statistical Analysis

Statistical analysis employed Student's t tests for single comparisons, or one-way ANOVA followed by Bonferroni post hoc tests for statistical significance for multiple comparisons. All "center" values from fit curves represent the means of those parameters fit to the individual data, and all data where curves could be unambiguously fit in Graphpad were included, except where sigmoidal

fits estimated a halfway point that fell outside the minimal or maximal values of the independent variable used to generate the data. To increase statistical power and avoid error due to multiple comparisons, data for individual constructs under given recording conditions were pooled for analysis, and a single ANOVA statistical test with posthoc analysis performed for any comparisons involving those datasets. For individual constructs, comparison of conductance in  $\text{Cl}^-$  versus  $\text{I}^-$  containing solutions were made using Student's t test, but no dataset was subjected to t test more than once.  $p < 0.01$  was used as a threshold for significance, and all values in text, and all data presented in summary graphs, are cited or shown as mean  $\pm$  SEM. n represents the number of individual cells or patches used in recordings, and is displayed either in summary graphs where possible, or in the figure legends where summary graphs are not shown or where display of n in figure would be aesthetically impractical. \*\*, \*\*\* and \*\*\*\* represent  $p < 0.01$ ,  $p < 0.001$  or  $p < 0.0001$  levels of significance, respectively.

### **Immunocytochemistry**

Image files were deconvolved using AutoQuantX3. Deconvolved images were analyzed for colocalization using ImarisColoc. Pearson's correlation coefficients were determined between TMEM16A and WGA, with the membrane of TMEM16A-transfected cells identified as the region of interest. Statistical significance was determined using 1-way ANOVA analysis followed by Bonferroni's post hoc test for significance.  $p < 0.01$  was used as a threshold for significance, and all values in text, and data are shown as mean  $\pm$  SEM n represents the number of individual cells used and is displayed in summary graph. \*\*, \*\*\* and \*\*\*\* represent  $p < 0.01$ ,  $p < 0.001$  or  $p < 0.0001$  levels of significance, respectively.

**Neuron, Volume 97**

**Supplemental Information**

**The Sixth Transmembrane Segment**

**Is a Major Gating Component**

**of the TMEM16A Calcium-Activated Chloride Channel**

**Christian J. Peters, John M. Gilchrist, Jason Tien, Neville P. Bethel, Lijun Qi, Tingxu Chen, Lynn Wang, Yuh Nung Jan, Michael Grabe, and Lily Y. Jan**

A nhTMEM16, 3.2  $\mu$ s simulation.

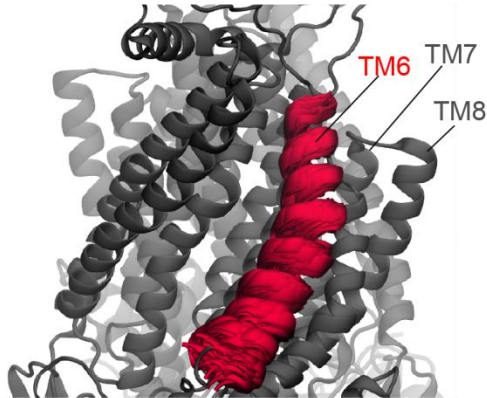

B

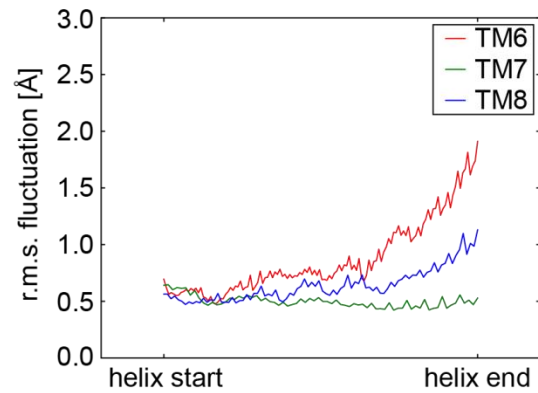

**Figure S1. Related to Figure 2. A structural model of TMEM16A based on the nhTMEM16 atomic resolution crystal structure.** A. Overlaid positions of the TM6 of nhTMEM16 (PDB: 4WIS) following 3.2  $\mu$ s of MD simulation. B. RMS fluctuation among predicted coordinates for TM6, 7 and 8 (scaled against helix length) of nhTMEM16 following 3.2  $\mu$ s of MD simulation.

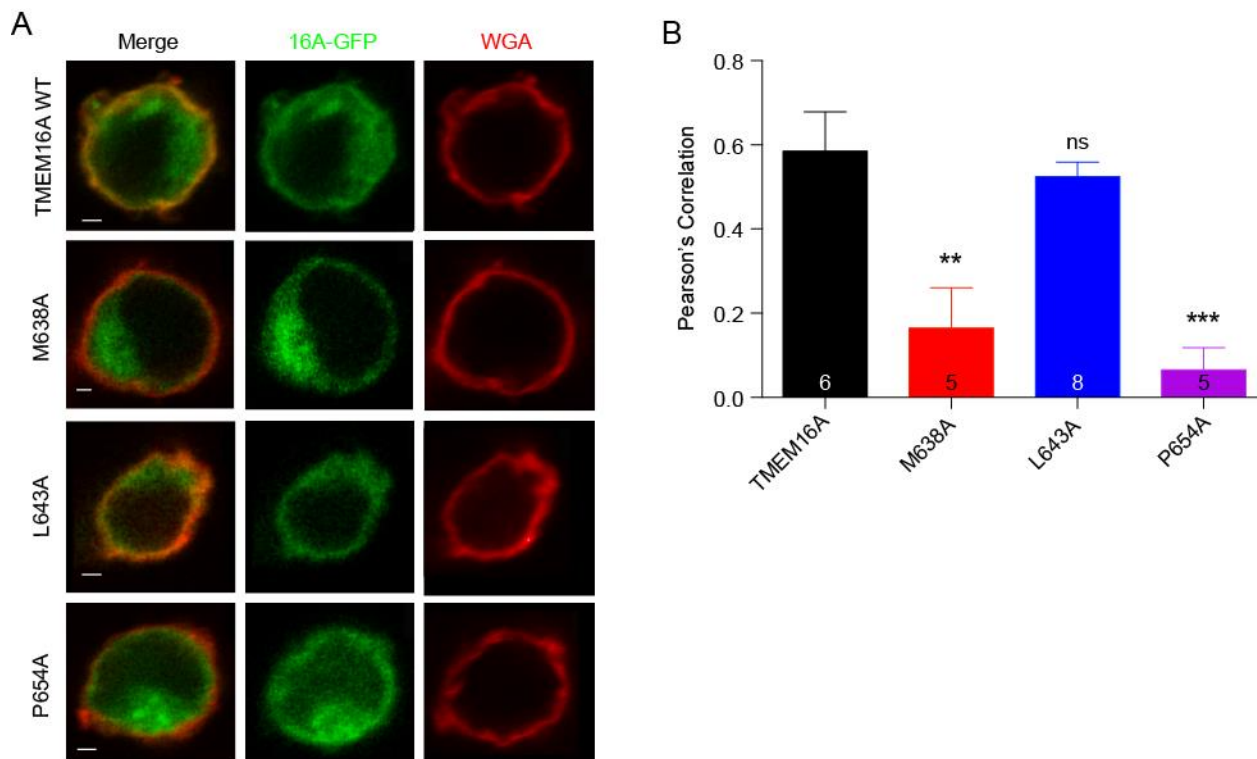

**Figure S2. Related to Figure 2. Surface expression comparisons of TMEM16A TM6 mutant constructs with wild-type.** A. pEGFP fusion constructs for wild-type TMEM16A and three mutant channels (M638A, L643A, P654A) with currents too small to accurately fit with  $EC_{50}$  for  $Ca^{2+}$  are expressed in HEK293 cells and co-stained with a rhodamine-tagged wheat germ agglutinin (WGA), a plasma membrane marker, to assess possible defects in surface expression. Scale bars denote 2  $\mu$ m. B. Pearson's correlations are calculated for green (TMEM16A-pEGFP) and red (WGA) channels in panel A, and average values compared by one-way ANOVA followed by Bonferroni post-hoc test for significance. Data are represented as mean  $\pm$  SEM.



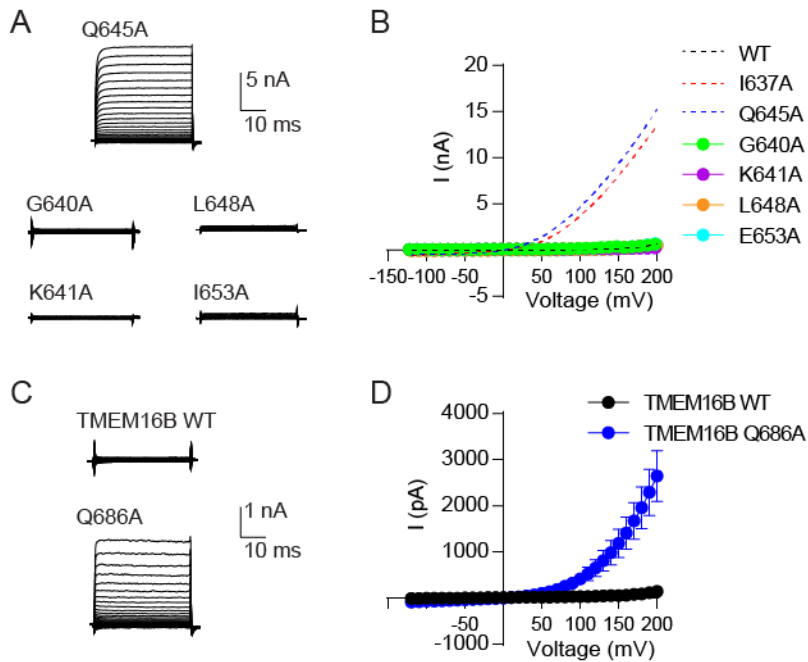

**Figure S3. Related to Figure 3. Effects of Ca<sup>2+</sup>-sensitizing shifting point mutations in TM6 on voltage-dependent currents of TMEM16A and TMEM16B.** A. Sample traces for whole cell recordings of TMEM16A mutants G640A, K641A, L648A and I653A, stepped to voltages from -120 to +200 mV in the presence of 0 Ca<sup>2+</sup> solution are compared with TMEM16A Q645A under the same conditions. B. Current-voltage relationship of TMEM16A G640A (n = 9), K641A (n = 6), L648A (n = 7) and I653A (n = 6) in the presence of 0 Ca<sup>2+</sup> compared against I637A, Q645A and WT (as in Figure 3B). C. Sample traces for whole cell recordings of TMEM16B and the mutant TMEM16B Q686A (equivalent to TMEM16A Q645A), stepped to voltages from -120 to +200 mV in the presence of 0 Ca<sup>2+</sup> solution. D. Current-voltage relationship of TMEM16B (n = 7) and TMEM16B Q686A (n = 8) as in panel C. Scale bars in panels A and C apply to all traces. Data are represented as mean ± SEM.

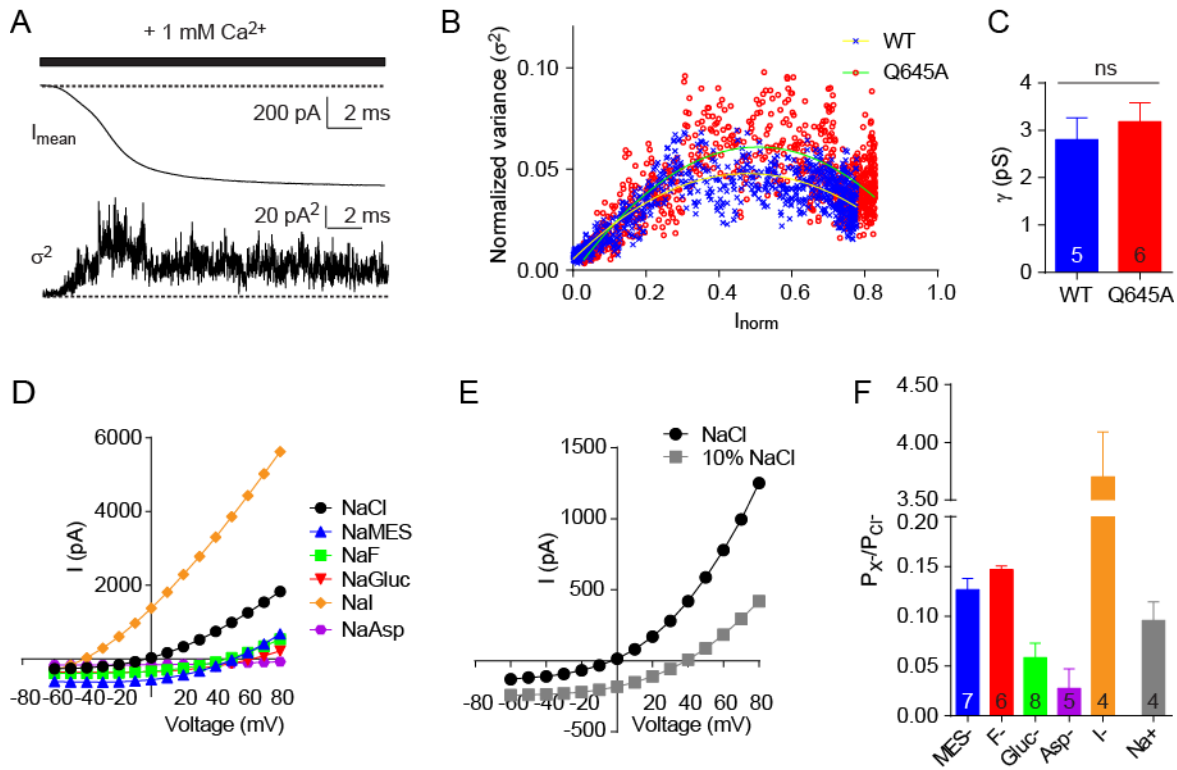

**Figure S4. Related to Figure 3. Q645A mutant channels retain conductance and selectivity properties of wild-type channel.** A. A sample inside out patch containing Q645A is exposed to a 1 mM Ca<sup>2+</sup> internal solution, rapidly exchanged from 0 Ca<sup>2+</sup> solution with a piezo-driven exchanger. Mean current amplitude and variance are shown across time points. B. Variance is normalized to current size, and plotted against it for sample traces for WT and Q645A channels, and the resulting scatter plots fit with Equation S1. C. Single channel conductance is unchanged by this mutant (Student's T-test). D. Current amplitudes from a sample whole cell recording of Q645A, exposed to a series of alternate external anions. E. Sample cell in D was exposed to an osmolality-adjusted solution containing 10% (14 mM NaCl) permeant ion strength. F. Based on experiments in D and E, permeability ratios are calculated for Q645A for all ions shown using Equation S2. All values were compared to 140 mM external NMDG-Cl (normalization point at 1.00) by one-way ANOVA and Bonferroni post-hoc test, and were statistically significantly different,  $p < 0.0001$ . Data are represented as mean  $\pm$  SEM.

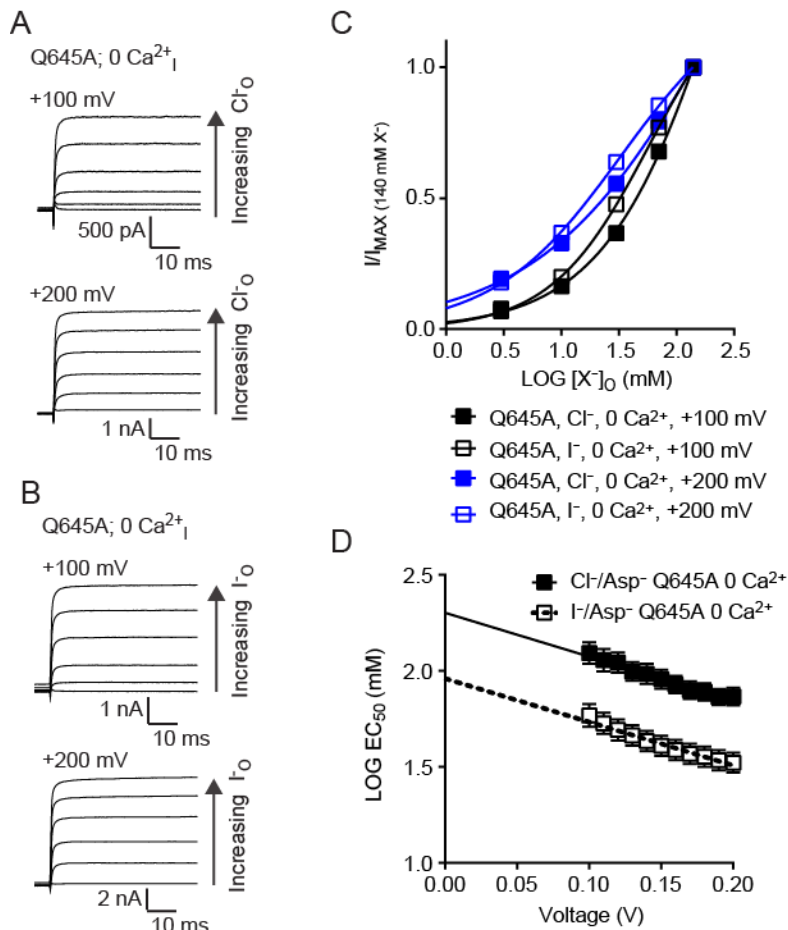

**Figure S5. Related to Figures 3-6. A unidirectional current flux voltage clamp assay identifies an anion-binding site near the external pore mouth with state dependent accessibility.** A. TMEM16A Q645A channels expressed in HEK293 cells recorded in the presence of 0 intracellular calcium and extracellular chloride ions in increasing concentrations are recorded in whole cell voltage clamp, shown at +100 mV and +200 mV, where intracellular solutions contain aspartate ions in lieu of chloride. B. Q645A channels recorded with extracellular iodide, instead of chloride. C. Concentration-dependence relationships are fit at each voltage tested (+100 mV and +200 mV shown) for current amplitude at increasing concentrations of each external permeant anion. D. LOG EC<sub>50</sub> for external anions is plotted for each voltage, and Equation 1 (in Methods) is fit to each set of points. Data are expressed as mean ± SEM and where error bars are invisible, they are contained within the points, n = 6 for both conditions.

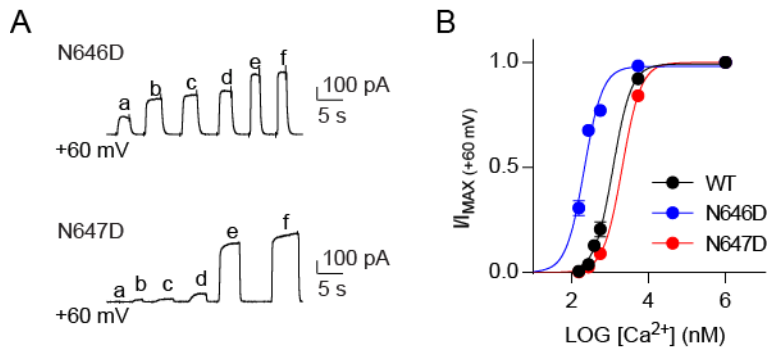

**Figure S6. Related to Figure 5. Two adjacent residues have distinct effects on Ca<sup>2+</sup> sensitivity.** A. Sample traces of inside-out patches pulled from HEK293 cells expressing the indicated construct and exposed to a series of increasing Ca<sup>2+</sup> concentrations at +60 mV. Solutions a-f contained 150 nM, 300 nM, 400 nM, 600 nM, 5.5  $\mu$ M and 1 mM Ca<sup>2+</sup>, respectively. B. Graph showing conductance at +60 mV at varying concentrations of Ca<sup>2+</sup>, as shown in A. A mutation introducing a negative charge at N646D creates a left shift in the calcium dependence of channel activation perhaps through increasing affinity for Ca<sup>2+</sup> at its binding site. n for these experiments was N646D, 9; N647D, 6. Data are represented as mean  $\pm$  SEM.

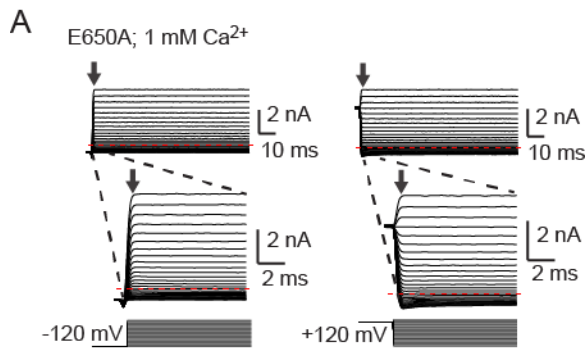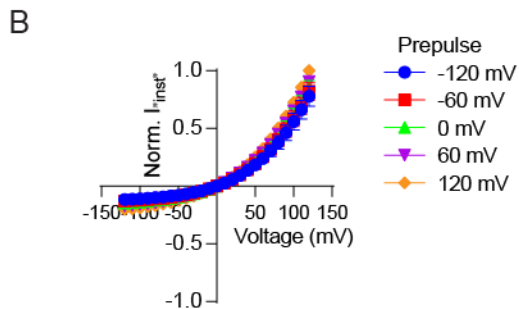

**Figure S7. Related to Figure 6. E650A mutant abolishes slow activating currents and instantaneous currents at negative potentials.** A. TMEM16A E650A with 1 mM internal  $\text{Ca}^{2+}$  stepped under voltage clamp from a pre-pulse potential of -120 mV (left) or +120 mV. Inset shows current amplitude immediately after voltage steps. Red dashed lines indicate 0 nA. B. “Instantaneous” current amplitudes from Q645A at voltages from -120 mV to +120 mV after prepulses to the indicated voltages, normalized to amplitude at +120 mV,  $n = 6$ . Data are represented as mean  $\pm$  SEM.
